# Supplementary material for: Saccharobisindole, Neoasterric Methyl Ester, and 7-Chloro-4(1H)-quinolone: Three New Compounds Isolated from the Marine Bacterium Saccharomonospora sp.
Source: MDPI journal article supplement (doi:10.3390/md20010035), 2021-12-29

## Supporting Information

### Supplementary File

#### **Saccharobisindole, neoasterric methyl ester, and 7-chloro-4(*1H*)-quinolone: three new compounds isolated from the marine bacterium *Saccharomonospora* sp.**

*Sohee Kim*<sup>1,†</sup>, *Tu Cam Le*<sup>2,3,†</sup>, *Sang-Ah Han*<sup>1,†</sup>, *Prima F. Hillman*<sup>4</sup>, *Ahreum Hong*<sup>1,5</sup>, *Sunghoon Hwang*<sup>6</sup>, *Young Eun Du*<sup>6</sup>, *Hiyoung Kim*<sup>7</sup>, *Dong-Chan Oh*<sup>6</sup>, *Sun-Shin Cha*<sup>4</sup>, *Jihye Lee*<sup>4,5,\*</sup>, *Sang-Jip Nam*<sup>4,\*</sup>, *William Fenical*<sup>8,\*</sup>

<sup>1</sup> The Graduate School of Industrial Pharmaceutical Sciences, Ewha Womans University, Seoul 03760, Republic of Korea

<sup>2</sup> Laboratory of Advanced Materials Chemistry, Advanced Institute of Materials Science, Ton Duc Thang University, Ho Chi Minh City, Vietnam

<sup>3</sup> Faculty of Applied Sciences, Ton Duc Thang University, Ho Chi Minh City, Vietnam

<sup>4</sup> Department of Chemistry and Nanoscience, Ewha Womans University, Seoul 03760, Republic of Korea

<sup>5</sup> Laboratories of Marine New Drugs, REDONE Seoul, Seoul 08594, Republic of Korea

<sup>6</sup> Natural Products Research Institute, College of Pharmacy, Seoul National University, Seoul 08826, Republic of Korea;

<sup>7</sup> Department of Biomedical Science and Engineering, Konkuk University, Seoul 05029, Republic of Korea

<sup>8</sup> Center for Marine Biotechnology and Biomedicine, Scripps Institution of Oceanography, University of California-San Diego, La Jolla, CA 92093-0204, USA

\* Correspondence: j13414@gmail.com; Tel.: +82-70-4219-1632 (J.L.); sjnam@ewha.ac.kr; Tel.: +82-2-3277-6805 (S.-J.N.); wfenical@ucsd.edu (W.F.); Tel: +1-858-259-3839 (W.F.)

## List of Supplementary Content

|                                                                                                                                             |     |
|---------------------------------------------------------------------------------------------------------------------------------------------|-----|
| <b>Figure S1.</b> $^1\text{H}$ NMR spectrum (300 MHz) of sacharobisindole ( <b>1</b> ) in $\text{DMSO-}d_6$ .....                           | S4  |
| <b>Figure S2.</b> $^{13}\text{C}$ NMR spectrum (75 MHz) of sacharobisindole ( <b>1</b> ) in $\text{DMSO-}d_6$ .....                         | S5  |
| <b>Figure S3.</b> COSY spectrum (300 MHz) of sacharobisindole ( <b>1</b> ) in $\text{DMSO-}d_6$ .....                                       | S6  |
| <b>Figure S4.</b> HSQC spectrum (300 MHz) of sacharobisindole ( <b>1</b> ) in $\text{DMSO-}d_6$ .....                                       | S7  |
| <b>Figure S5.</b> HMBC spectrum (300 MHz) of sacharobisindole ( <b>1</b> ) in $\text{DMSO-}d_6$ .....                                       | S8  |
| <b>Figure S6.</b> NOESY spectrum (400 MHz) of sacharobisindole ( <b>1</b> ) in $\text{DMSO-}d_6$ .....                                      | S9  |
| <b>Figure S7.</b> High resolution mass data of sacharobisindole ( <b>1</b> ) .....                                                          | S10 |
| <b>Figure S8.</b> Alpha-D data and calculated optical rotation of saccharobisinodle ( <b>1</b> ).....                                       | S11 |
| <b>Figure S9.</b> $^1\text{H}$ NMR spectrum (400 MHz) of neoasterric methyl ester ( <b>2</b> ) in $\text{DMSO-}d_6$ .....                   | S12 |
| <b>Figure S10.</b> $^{13}\text{C}$ NMR spectrum (100 MHz) of neoasterric methyl ester ( <b>2</b> ) in $\text{DMSO-}d_6$ .....               | S13 |
| <b>Figure S11.</b> COSY spectrum (400 MHz) of neoasterric methyl ester ( <b>2</b> ) in $\text{DMSO-}d_6$ .....                              | S14 |
| <b>Figure S12.</b> HSQC spectrum (400 MHz) of neoasterric methyl ester ( <b>2</b> ) in $\text{DMSO-}d_6$ .....                              | S15 |
| <b>Figure S13.</b> HMBC spectrum (400 MHz) of neoasterric methyl ester ( <b>2</b> ) in $\text{DMSO-}d_6$ .....                              | S16 |
| <b>Figure S14.</b> $^1\text{H}$ NMR spectrum (400 MHz) of 7-chloro-4( <i>1H</i> )-quinolone ( <b>3</b> ) in $\text{CD}_3\text{OD}$ .....    | S17 |
| <b>Figure S15.</b> $^{13}\text{C}$ NMR spectrum (100 MHz) of 7-chloro-4( <i>1H</i> )-quinolone ( <b>3</b> ) in $\text{CD}_3\text{OD}$ ..... | S18 |
| <b>Figure S16.</b> COSY spectrum (400 MHz) of 7-chloro-4( <i>1H</i> )-quinolone ( <b>3</b> ) in $\text{CD}_3\text{OD}$ .....                | S19 |
| <b>Figure S17.</b> HSQC spectrum (400 MHz) of 7-chloro-4( <i>1H</i> )-quinolone ( <b>3</b> ) in $\text{CD}_3\text{OD}$ .....                | S20 |
| <b>Figure S18.</b> HMBC spectrum (400 MHz) of 7-chloro-4( <i>1H</i> )-quinolone ( <b>3</b> ) in $\text{CD}_3\text{OD}$ .....                | S21 |
| <b>Figure S19.</b> LR-ESI-MS spectroscopic data of 7-chloro-4( <i>1H</i> )-quinolone ( <b>3</b> ).....                                      | S22 |
| <b>Figure S20.</b> $^1\text{H}$ NMR spectrum (400 MHz) of acremonidine E ( <b>4</b> ) in $\text{DMSO-}d_6$ .....                            | S23 |
| <b>Figure S21.</b> $^{13}\text{C}$ NMR spectrum (100 MHz) of acremonidine E ( <b>4</b> ) in $\text{DMSO-}d_6$ .....                         | S24 |
| <b>Figure S22.</b> $^1\text{H}$ NMR spectrum (400 MHz) of pinselin ( <b>5</b> ) in $\text{DMSO-}d_6$ .....                                  | S25 |
| <b>Figure S23.</b> $^{13}\text{C}$ NMR spectrum (100 MHz) of pinselin ( <b>5</b> ) in $\text{DMSO-}d_6$ .....                               | S26 |

|                                                                                                                          |     |
|--------------------------------------------------------------------------------------------------------------------------|-----|
| <b>Figure S24.</b> $^1\text{H}$ NMR spectrum (400 MHz) of penicitrinon A ( <b>6</b> ) in $\text{CD}_3\text{OD}$ .....    | S27 |
| <b>Figure S25.</b> $^{13}\text{C}$ NMR spectrum (100 MHz) of penicitrinon A ( <b>6</b> ) in $\text{CD}_3\text{OD}$ ..... | S28 |
| <b>Figure S26.</b> $^1\text{H}$ NMR spectrum (400 MHz) of penicitrinon E ( <b>7</b> ) in $\text{CD}_3\text{OD}$ .....    | S29 |

**Figure S1.**  $^1\text{H}$  NMR spectrum (300 MHz) of saccharobisindole (**1**) in  $\text{DMSO}-d_6$

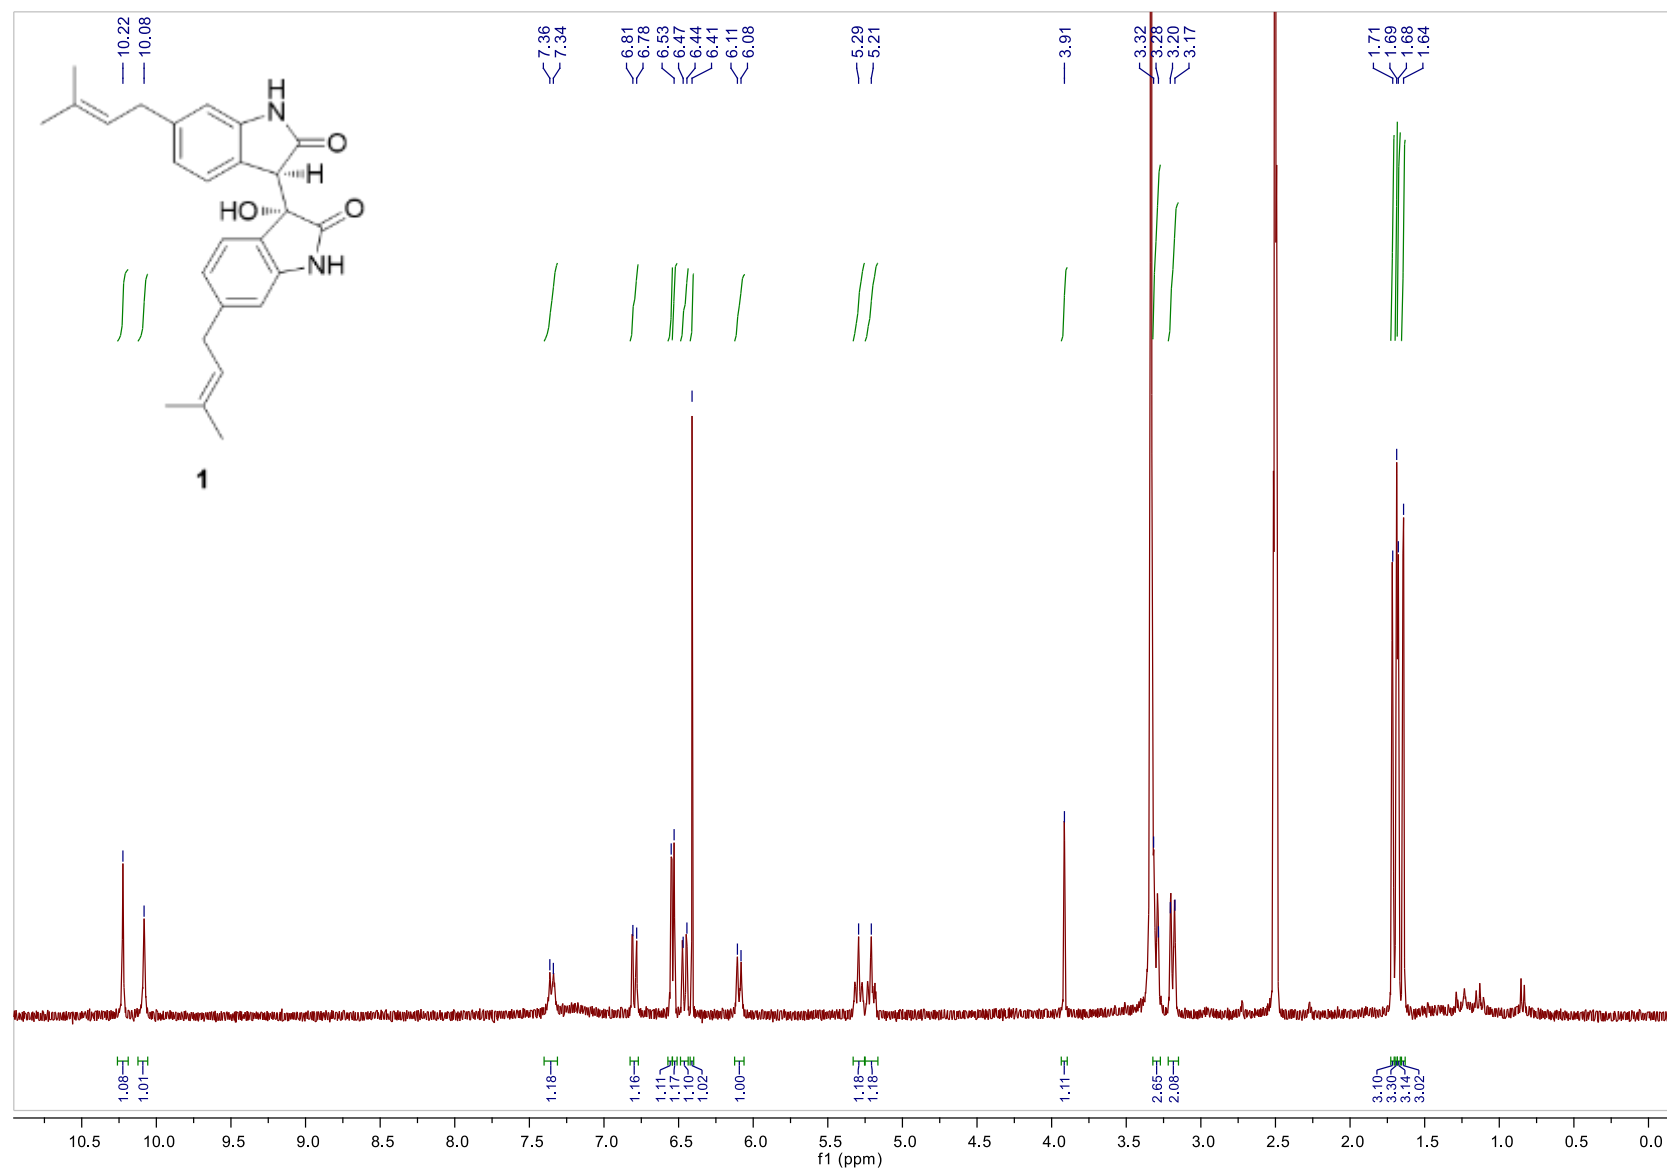

**Figure S2.**  $^{13}\text{C}$  NMR spectrum (75 MHz) of saccharobisindole (**1**) in  $\text{DMSO-}d_6$

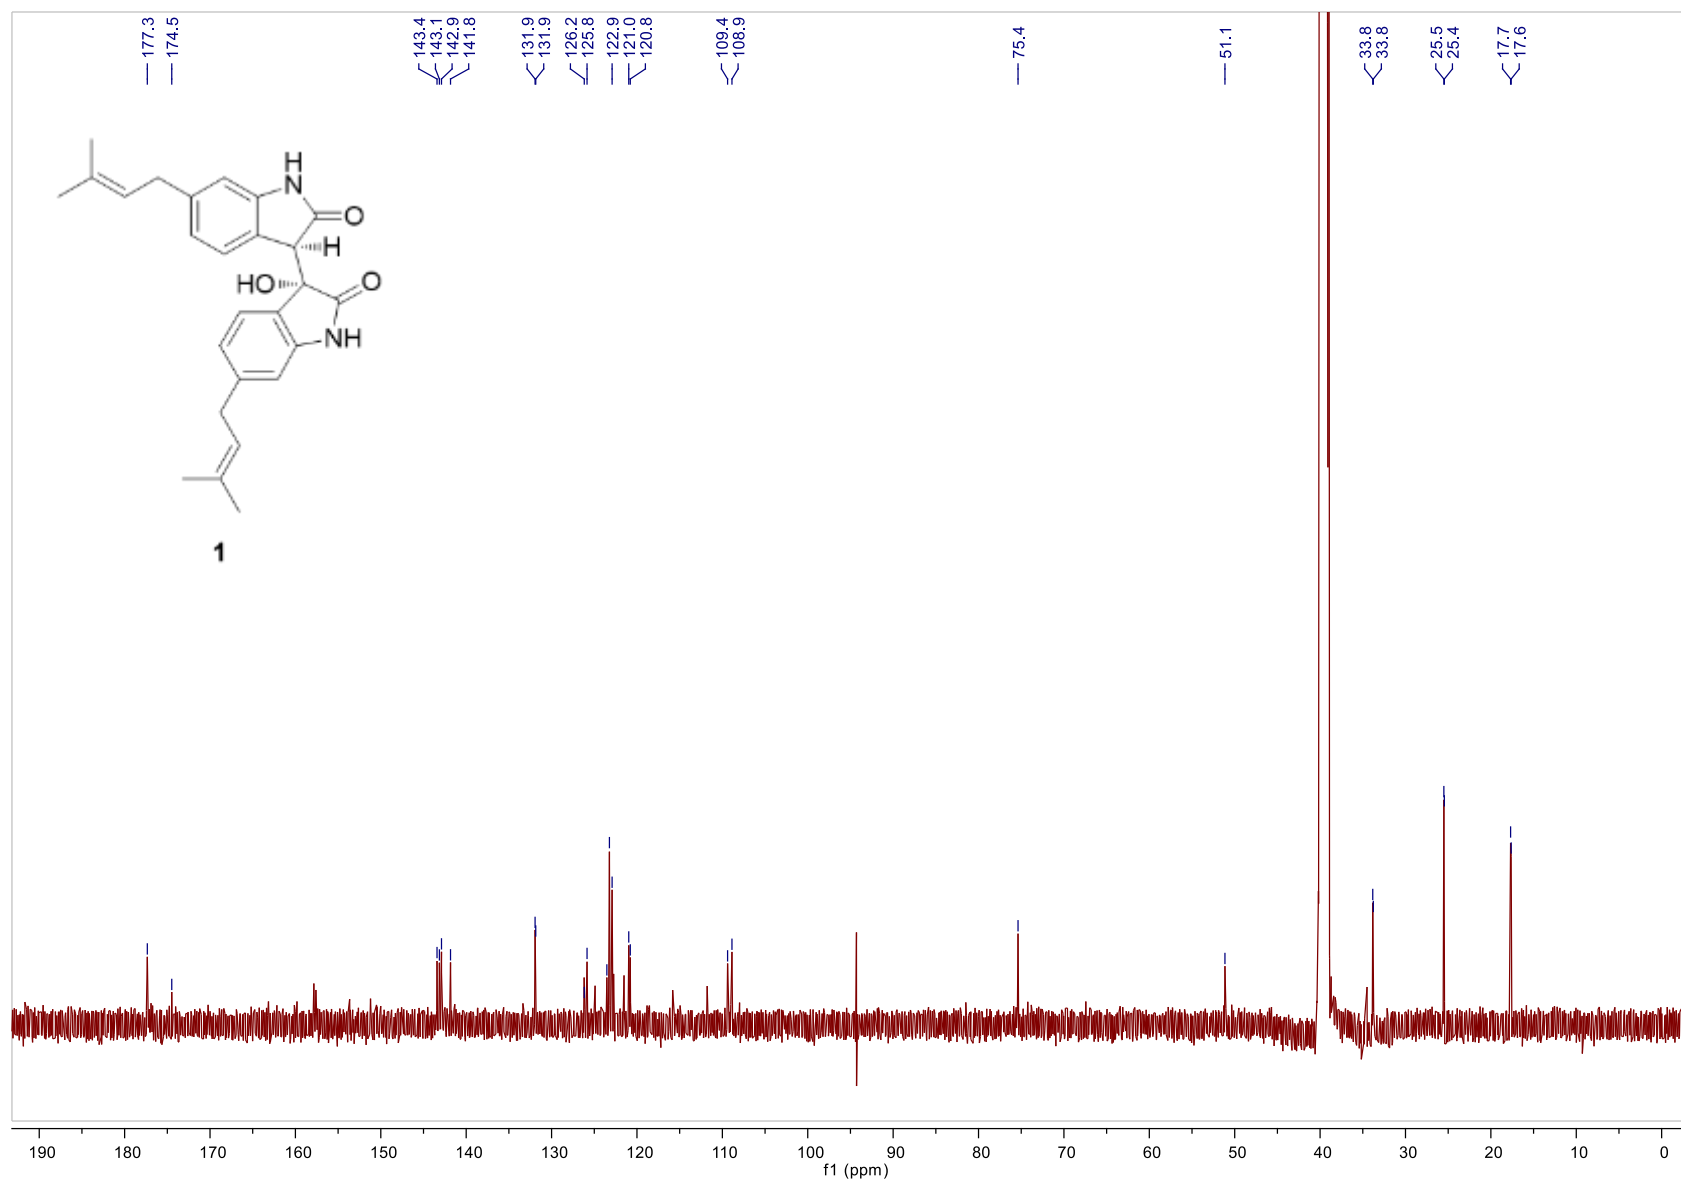

**Figure S3.** COSY spectrum (300 MHz) of saccharobisindole (**1**) in DMSO- $d_6$

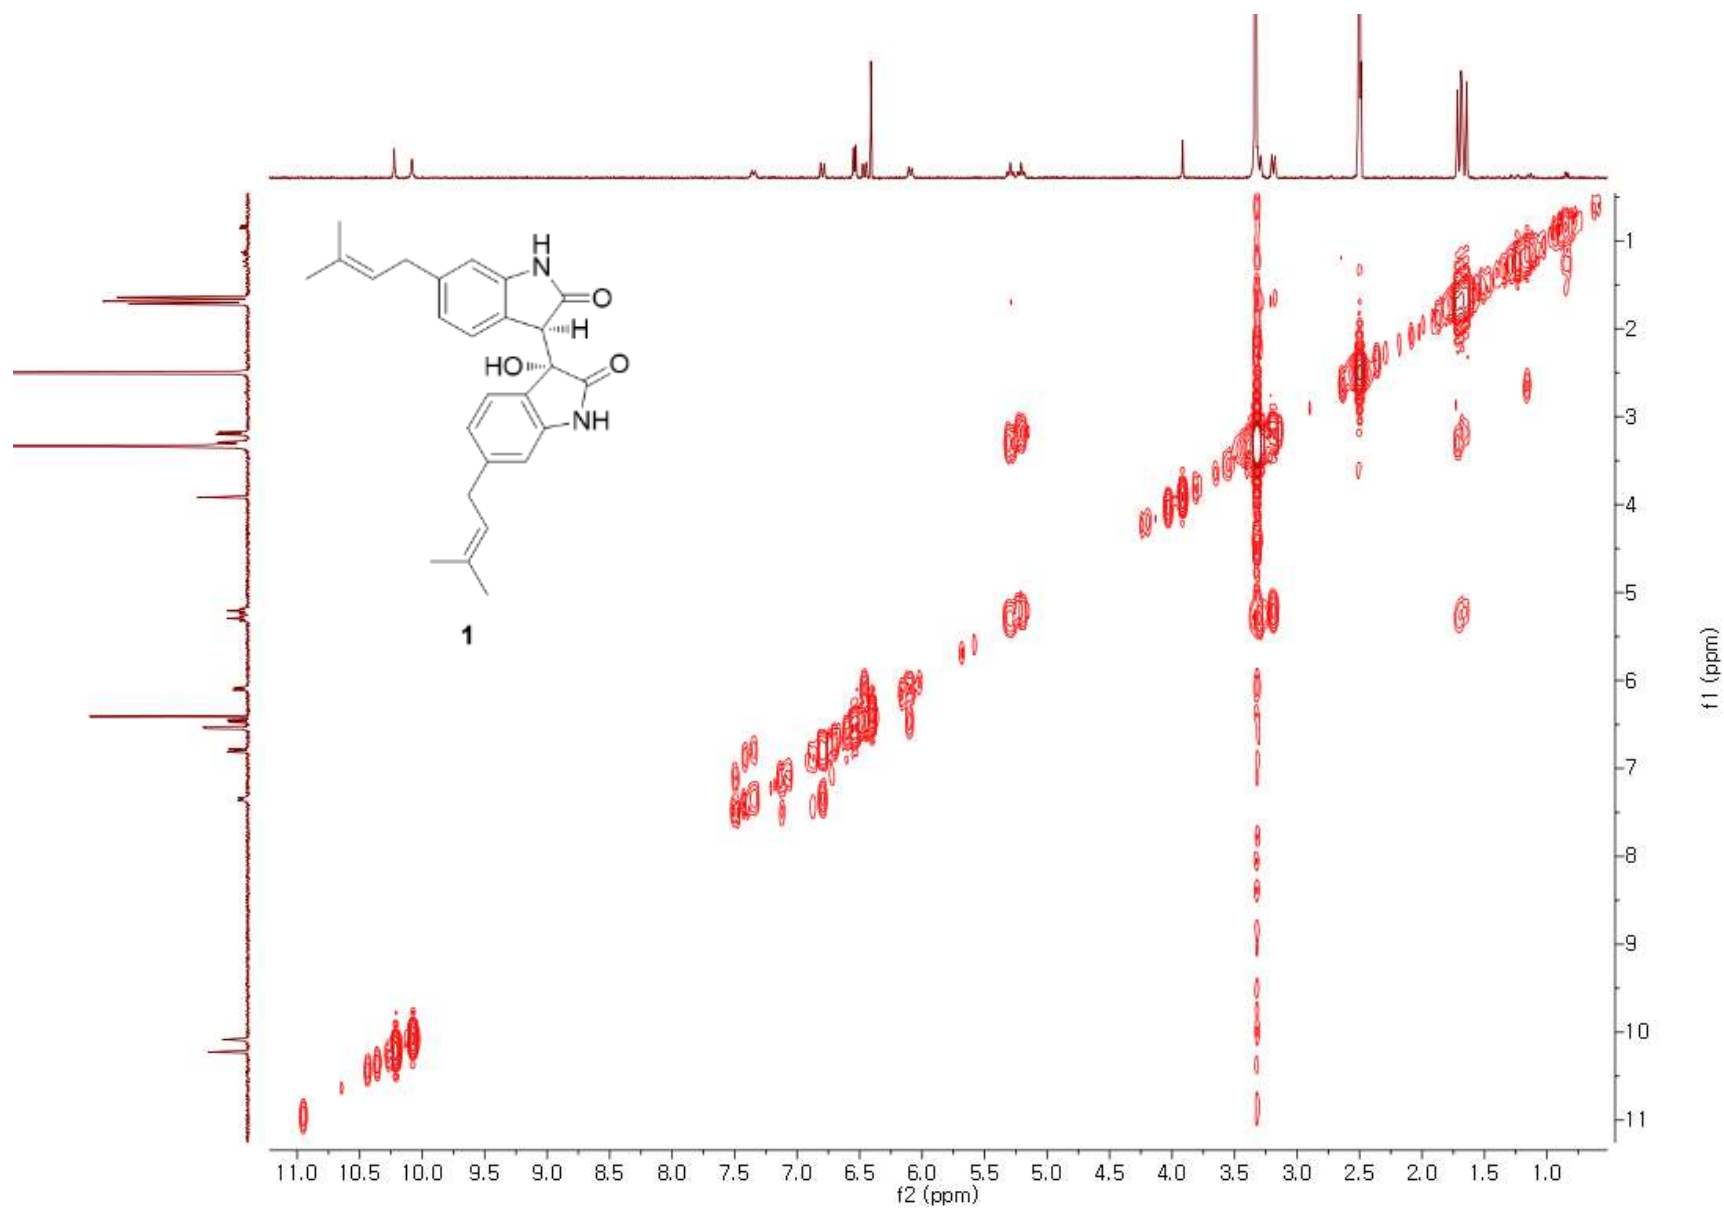

**Figure S4.** HSQC spectrum (300 MHz) of saccharobisindole (**1**) in DMSO-*d*<sub>6</sub>

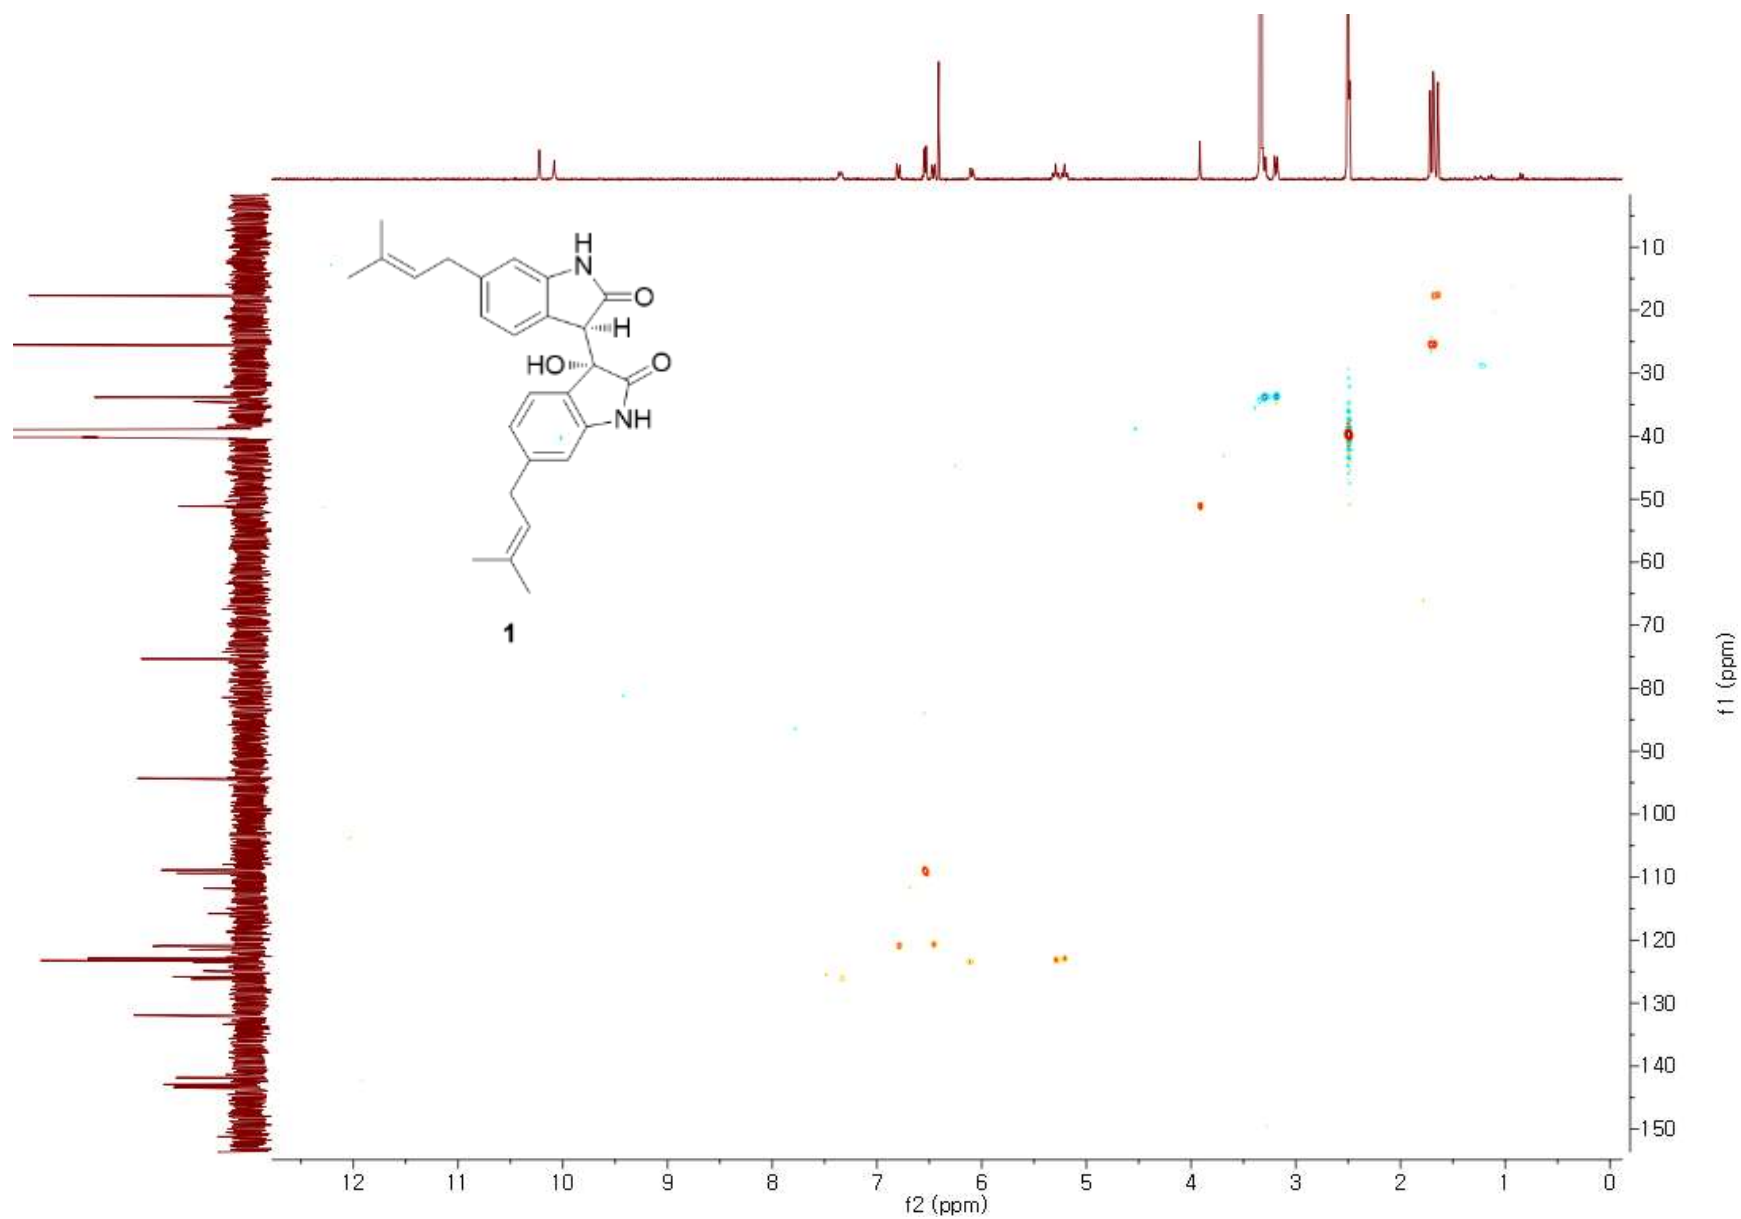

**Figure S5.** HMBC spectrum (300 MHz) of saccharobisindole (**1**) in DMSO- $d_6$

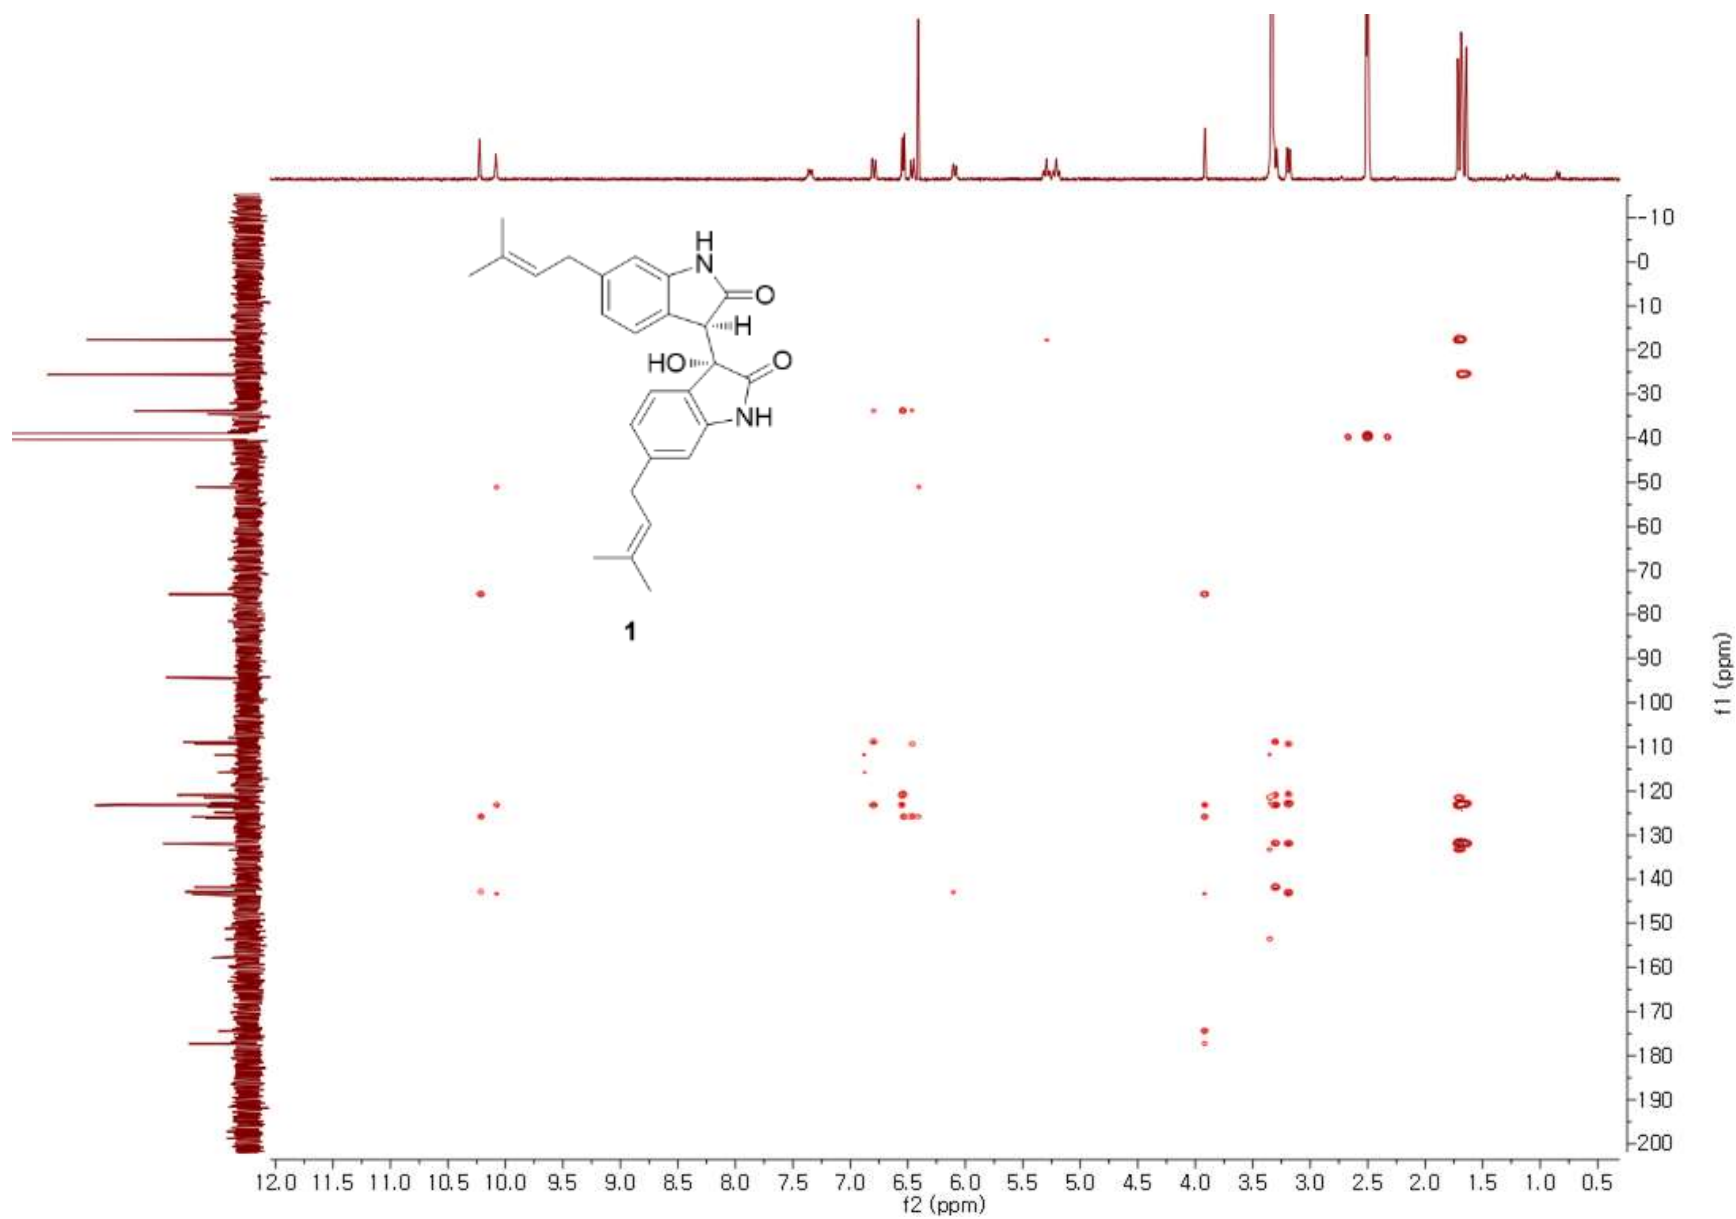



**Figure S6.** NOESY spectrum (300 MHz) of saccharobisindole (**1**) in DMSO- $d_6$

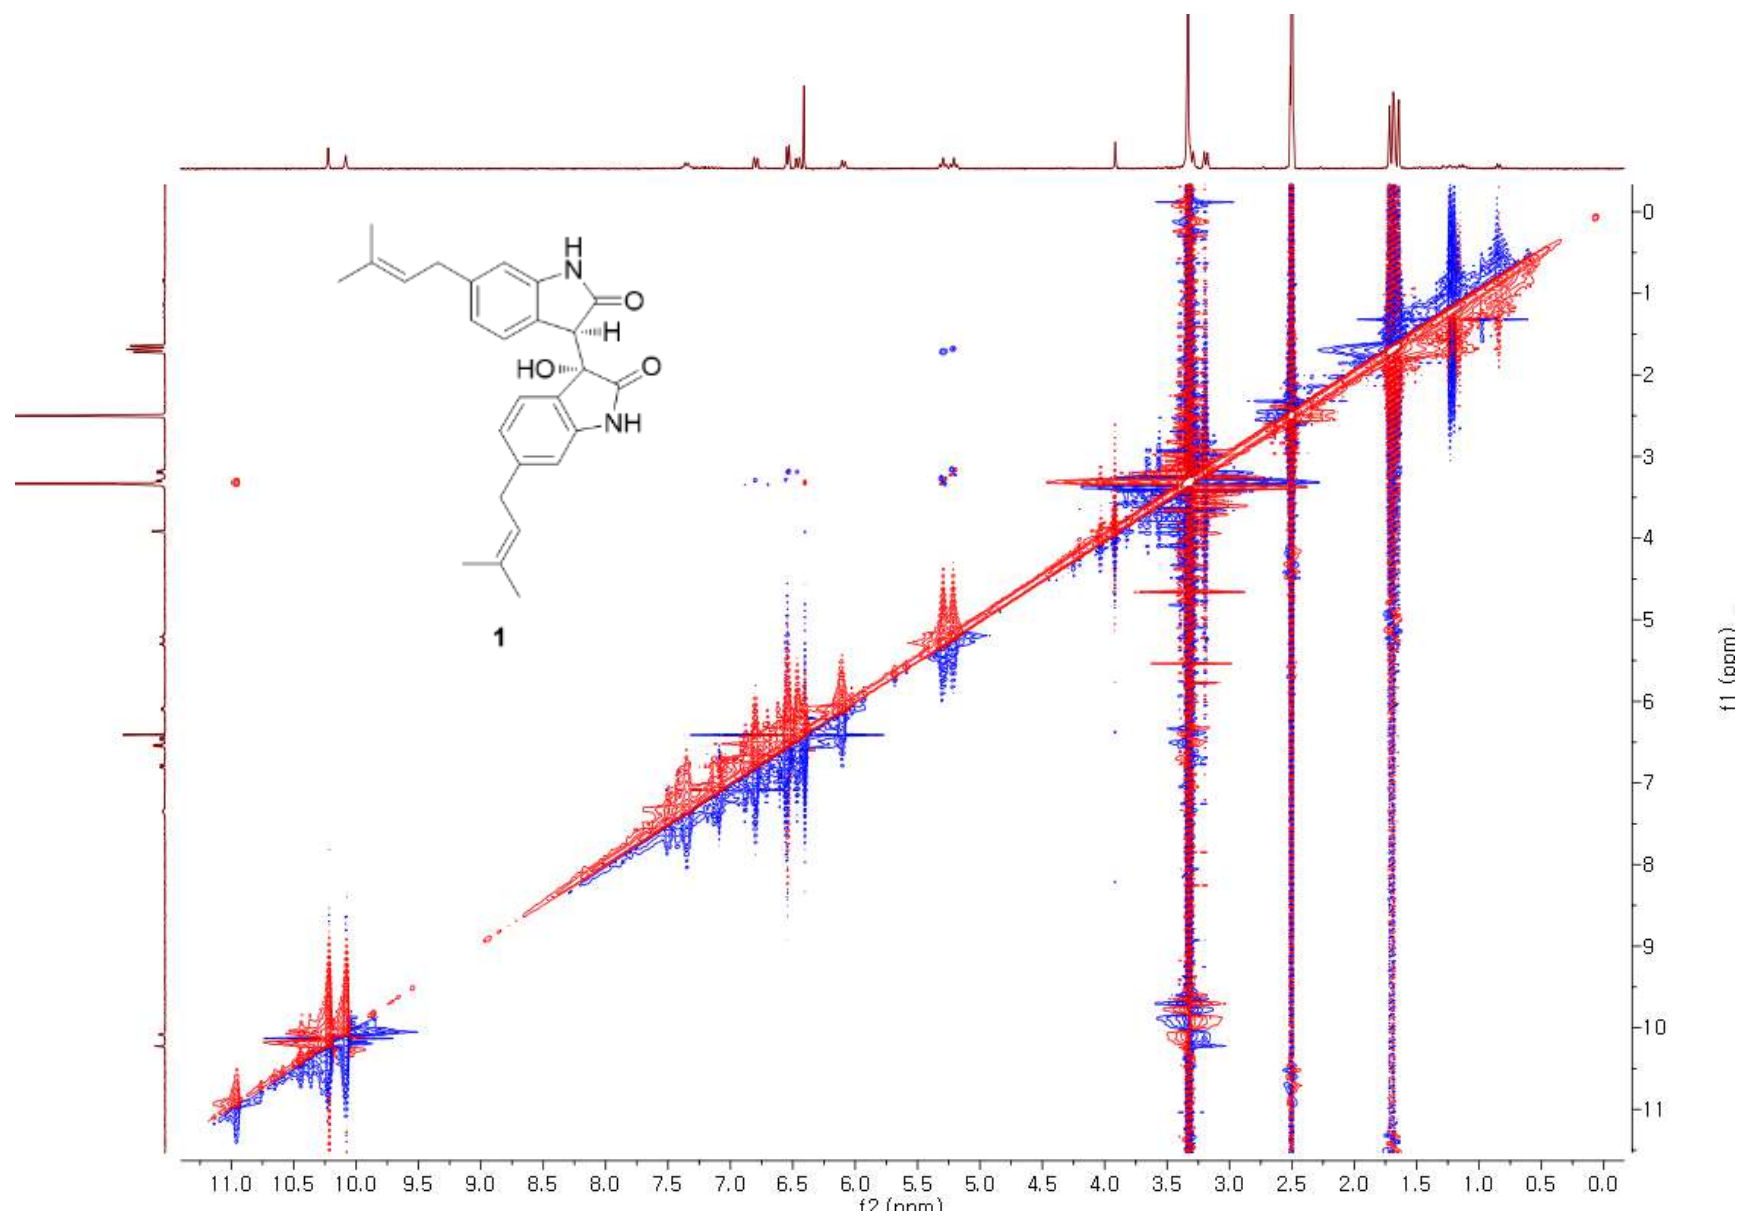

**Figure S7.** High resolution mass data of saccharobisindole (1)

```
[ Elemental Composition ]
Data : FAB-P861                      Date : 29-Sep-2017 17:17
Sample: CNQ490D5-1(C5-1)
Note : m-NBA
Inlet : Direct                       Ion Mode : FAB+
RT : 1.81 min                        Scan#: (81,88)
Elements : C 100/0, H 100/0, N 10/0, O 10/0
Mass Tolerance : 20ppm, 5mmu if m/z < 250, 10mmu if m/z > 500
Unsaturation (U.S.) : -0.5 - 50.0

Observed m/z  Int%  Err[ppm / mmu]  U.S.  Composition
417.2181      0.6    -5.7 / -2.4    18.0  C 29 H 27 N 3
               -19.8 / -8.3    14.5  C 21 H 25 N 10
               -8.9 / -3.7    17.5  C 31 H 29 O
               +7.1 / +3.0    14.5  C 22 H 25 N 8 O
               +3.9 / +1.6    14.0  C 24 H 27 N 5 O 2
               +0.7 / +0.3    13.5  C 26 H 29 N 2 O 3
               -13.4 / -5.6    10.0  C 18 H 27 N 9 O 3
               +16.8 / +7.0    10.5  C 17 H 25 N 10 O 3
               -16.6 / -6.9     9.5  C 20 H 29 N 6 O 4
               +13.6 / +5.7    10.0  C 19 H 27 N 7 O 4
               -19.8 / -8.3     9.0  C 22 H 31 N 3 O 5
               +10.3 / +4.3     9.5  C 21 H 29 N 4 O 5
               +7.1 / +3.0     9.0  C 23 H 31 N O 6
               -6.9 / -2.9     5.5  C 15 H 29 N 8 O 6
               -10.2 / -4.2     5.0  C 17 H 31 N 5 O 7
               +20.0 / +8.3     5.5  C 16 H 29 N 6 O 7
               -13.4 / -5.6     4.5  C 19 H 33 N 2 O 8
               +16.8 / +7.0     5.0  C 18 H 31 N 3 O 8
               +2.7 / +1.1     1.5  C 10 H 29 N 10 O 8
               +13.5 / +5.7     4.5  C 20 H 33 O 9
               -0.5 / -0.2     1.0  C 12 H 31 N 7 O 9
               -3.7 / -1.6     0.5  C 14 H 33 N 4 O 10

[ Theoretical Ion Distribution ]
Molecular Formula : C26 H29 N2 O3
(m/z 417.2178, MW 417.5279, U.S. 13.5)
Base Peak : 417.2178, Averaged MW : 417.5252(a), 417.5260(w)

m/z      INT.
417.2178 100.0000 *****
418.2210 29.7671 *****
419.2239 4.8696 ***
420.2267 0.5713
421.2295 0.0528
422.2321 0.0040
423.2348 0.0003
```

**Figure S8.** Alpha-D data and Calculated optical rotation of saccharobisindole (**1**)

| Basis functions                             | Def-SV(P) | 6-31G*        | 6-31G**       |
|---------------------------------------------|-----------|---------------|---------------|
| <i>R,R</i> - diastereomer                   | -798.2    | -868.15       | -889.46       |
| <i>R,S</i> – diastereomer                   | -12.43    | <b>+40.51</b> | <b>+51.93</b> |
| <i>S,R</i> – diastereomer                   | -725.36   | -751.83       | -764.03       |
| <i>S,S</i> - diastereomer                   | -252.74   | -315.09       | -308.47       |
| Experimental optical rotation : <b>+161</b> |           |               |               |

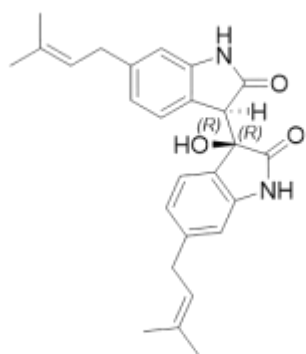

*R,R* - diastereomer

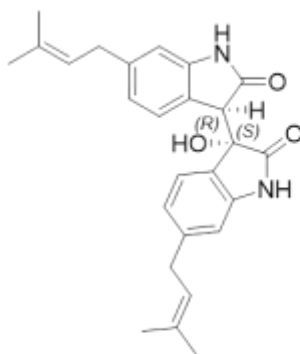

*R,S* - diastereomer

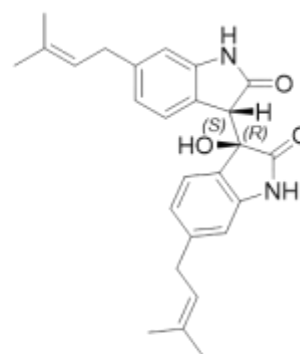

*S,R* - diastereomer

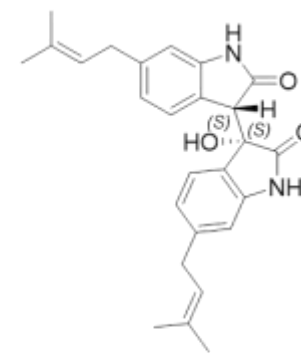

*S,S* - diastereomer

**Figure S9.**  $^1\text{H}$  NMR Spectrum (400 MHz) of neoasterric methyl ester (**2**) in  $\text{DMSO-}d_6$

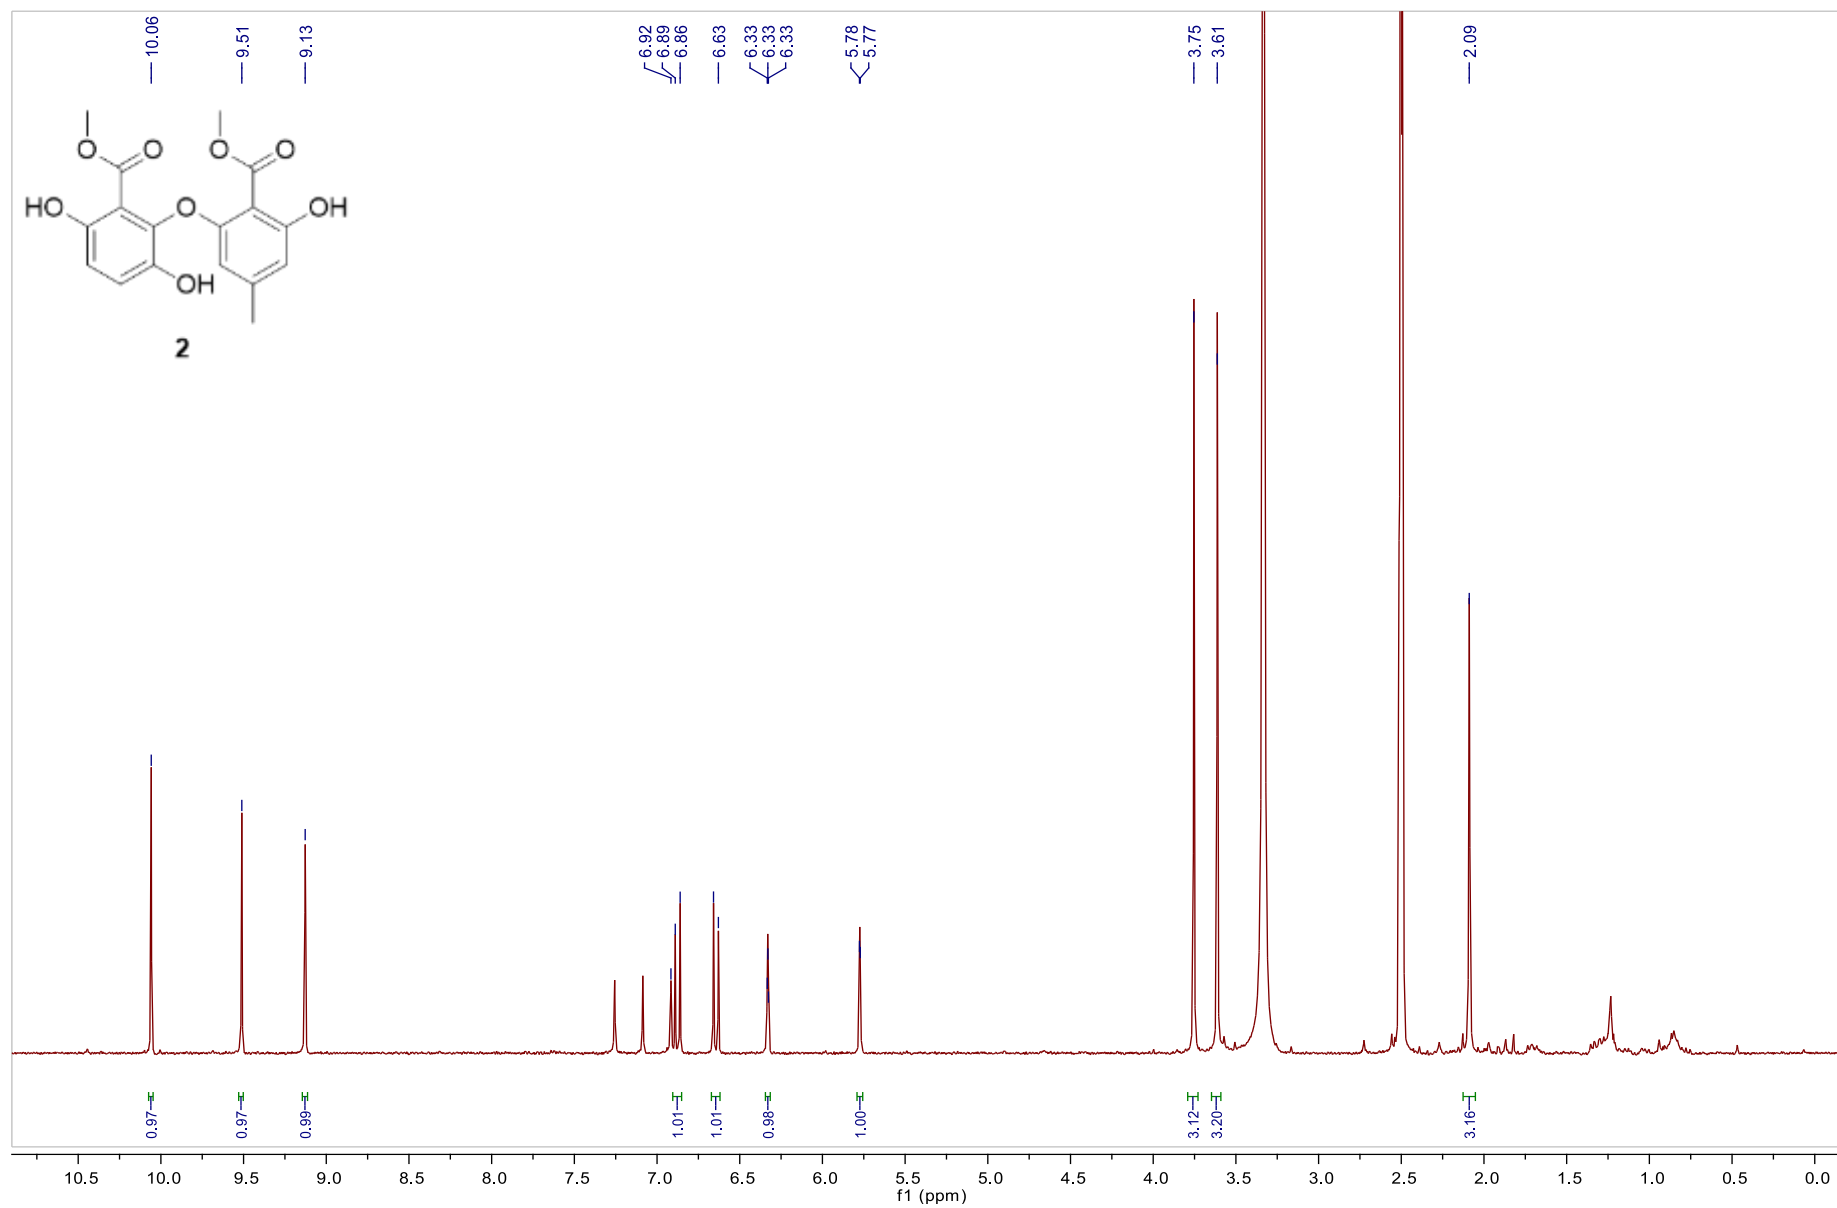

**Figure S10.**  $^{13}\text{C}$  NMR Spectrum (100 MHz) of neoasterric methyl ester (**2**) in  $\text{DMSO-}d_6$

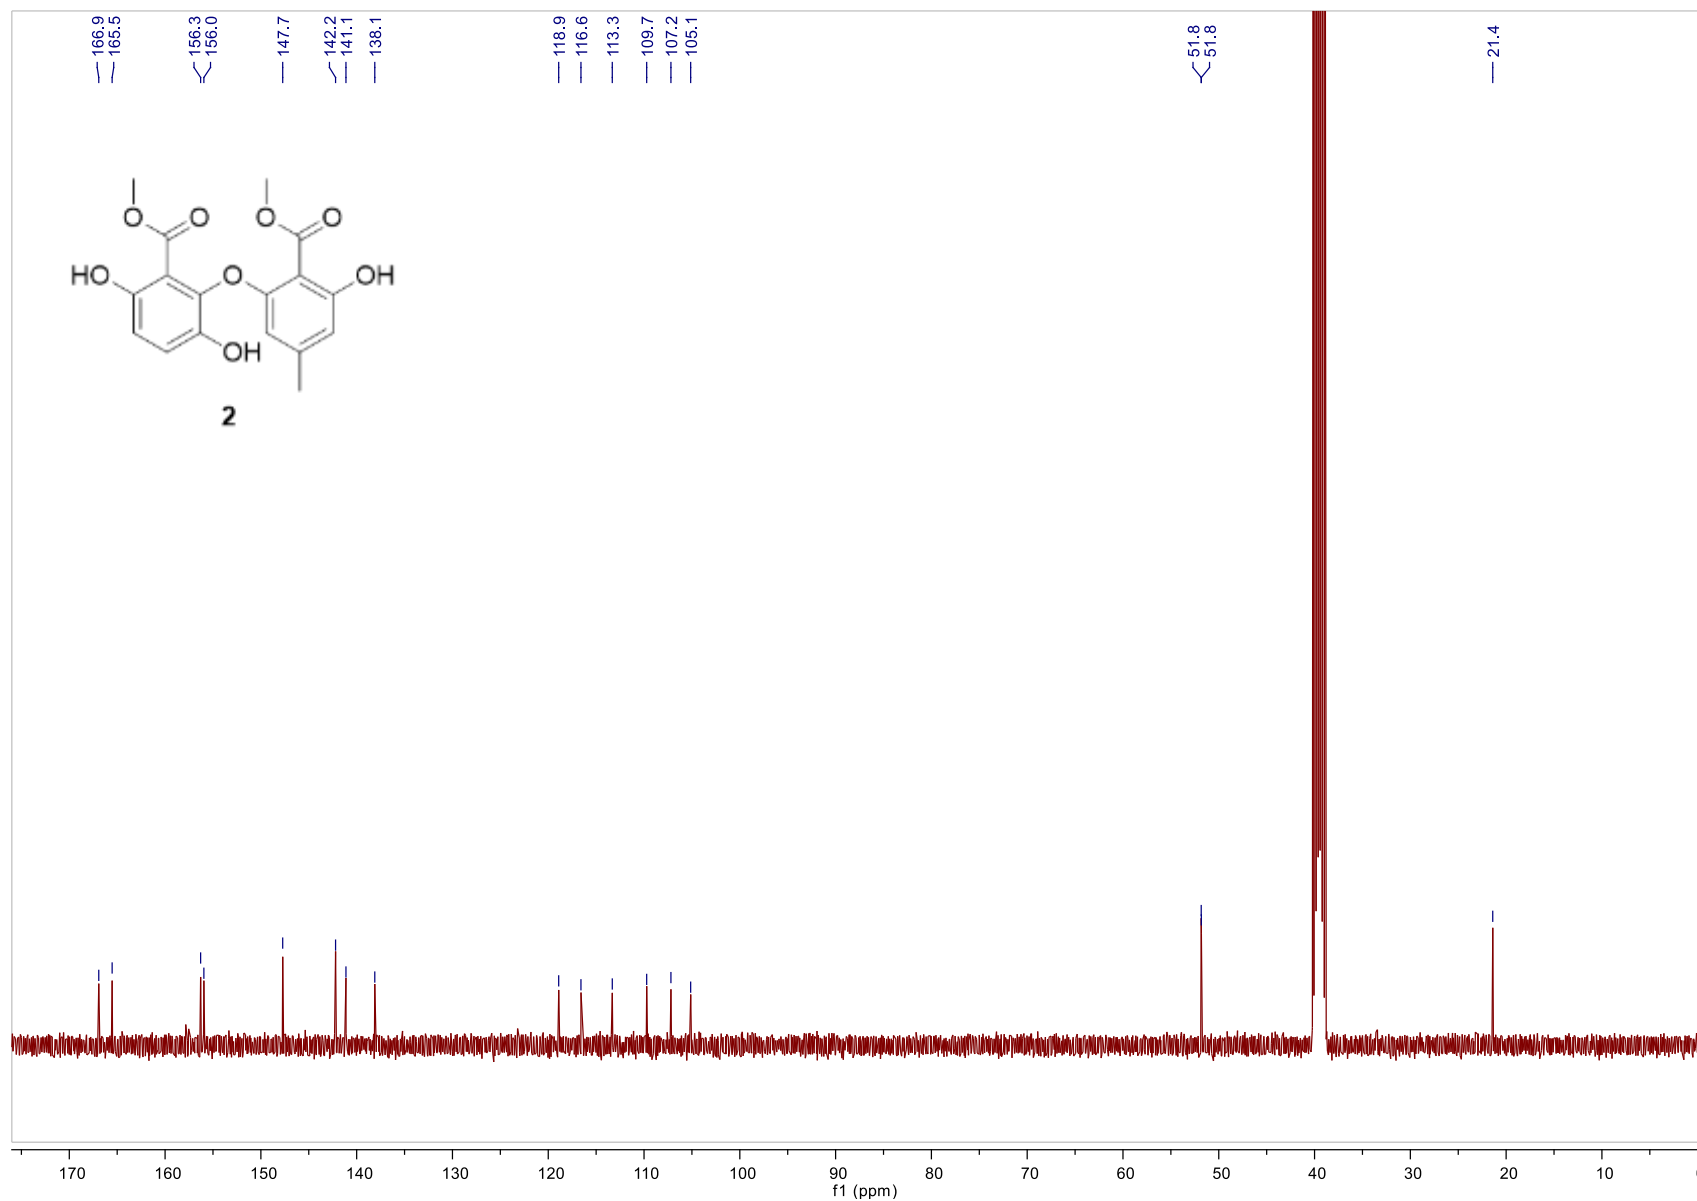

**Figure S11.** COSY Spectra (400 MHz) of neoasterric methyl ester (**2**) in DMSO- $d_6$

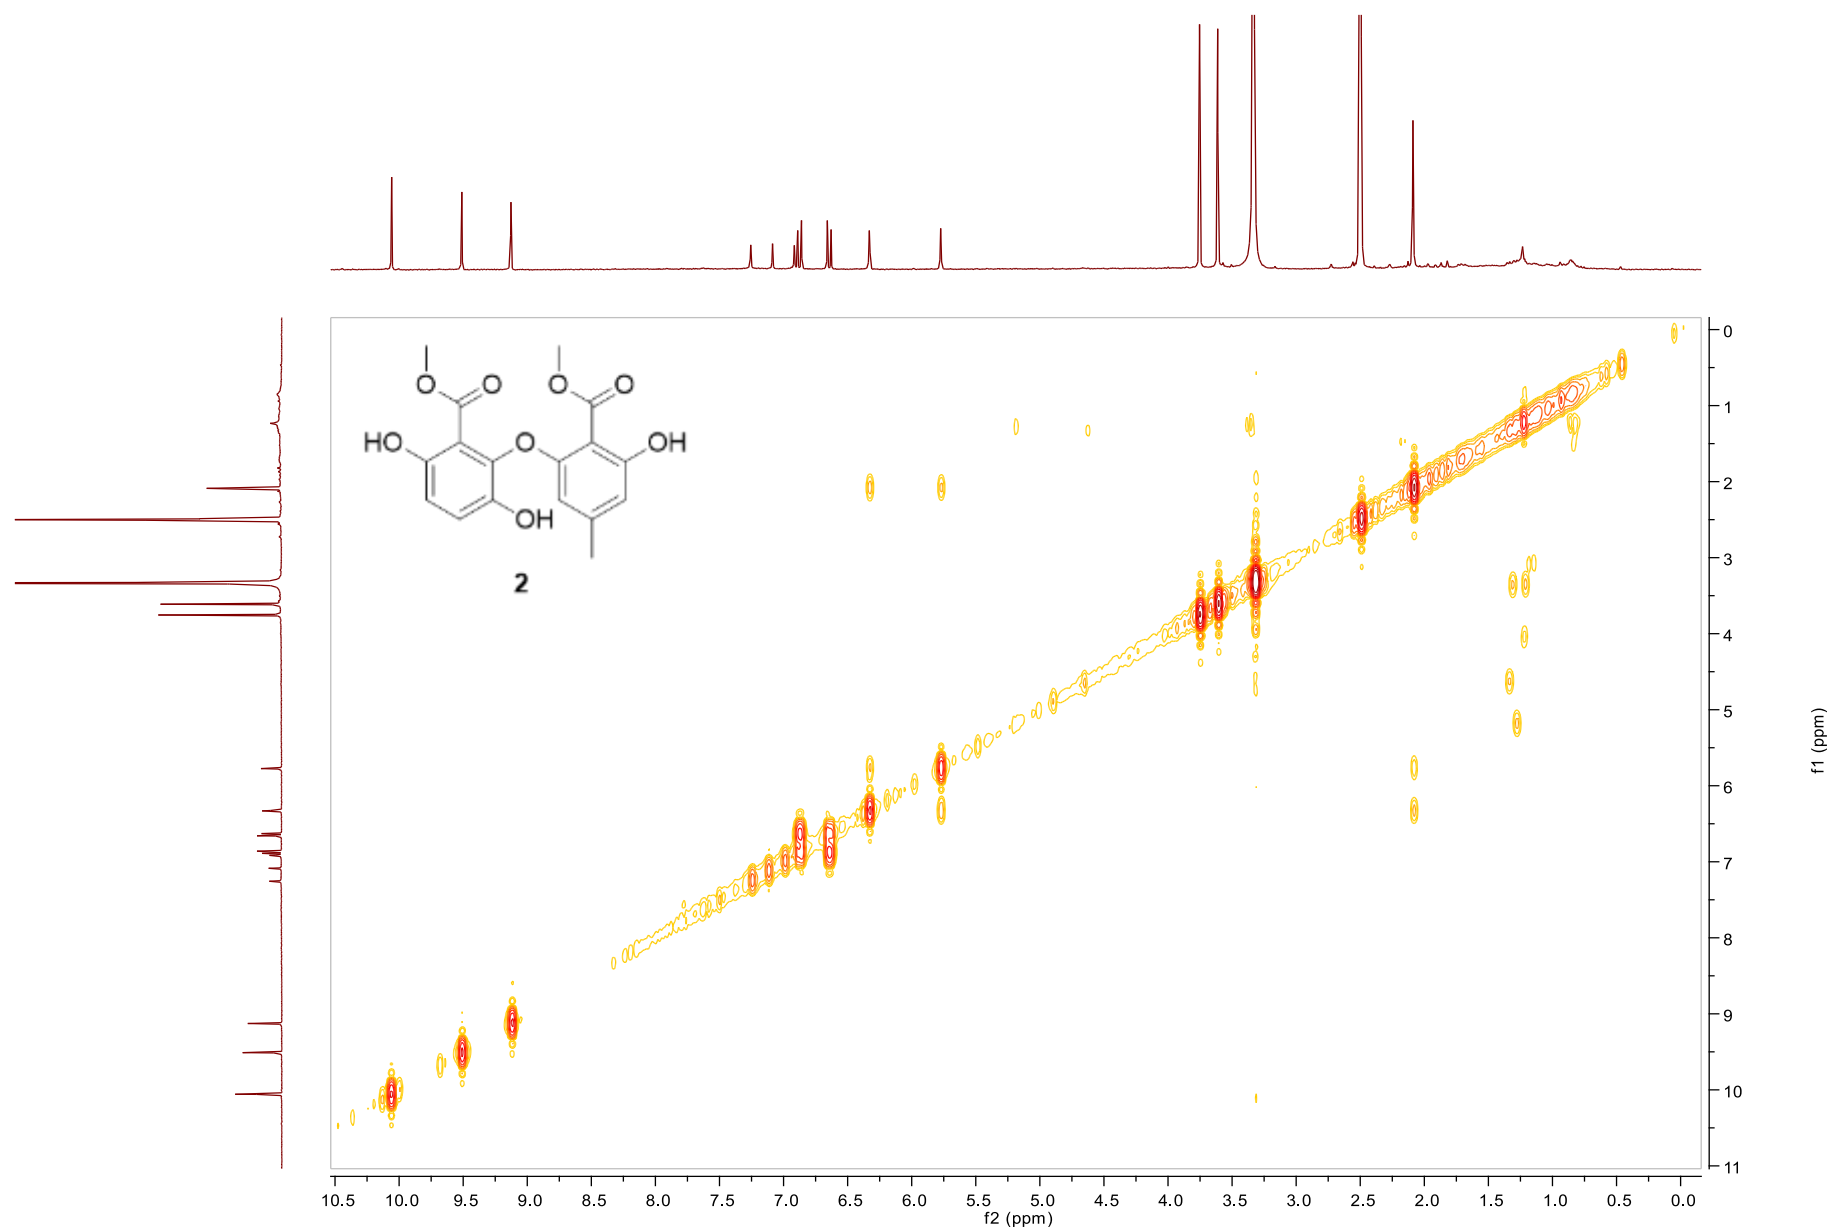

**Figure S12.** HSQC Spectra (400 MHz) of neoasterric methyl ester (**2**) in DMSO- $d_6$

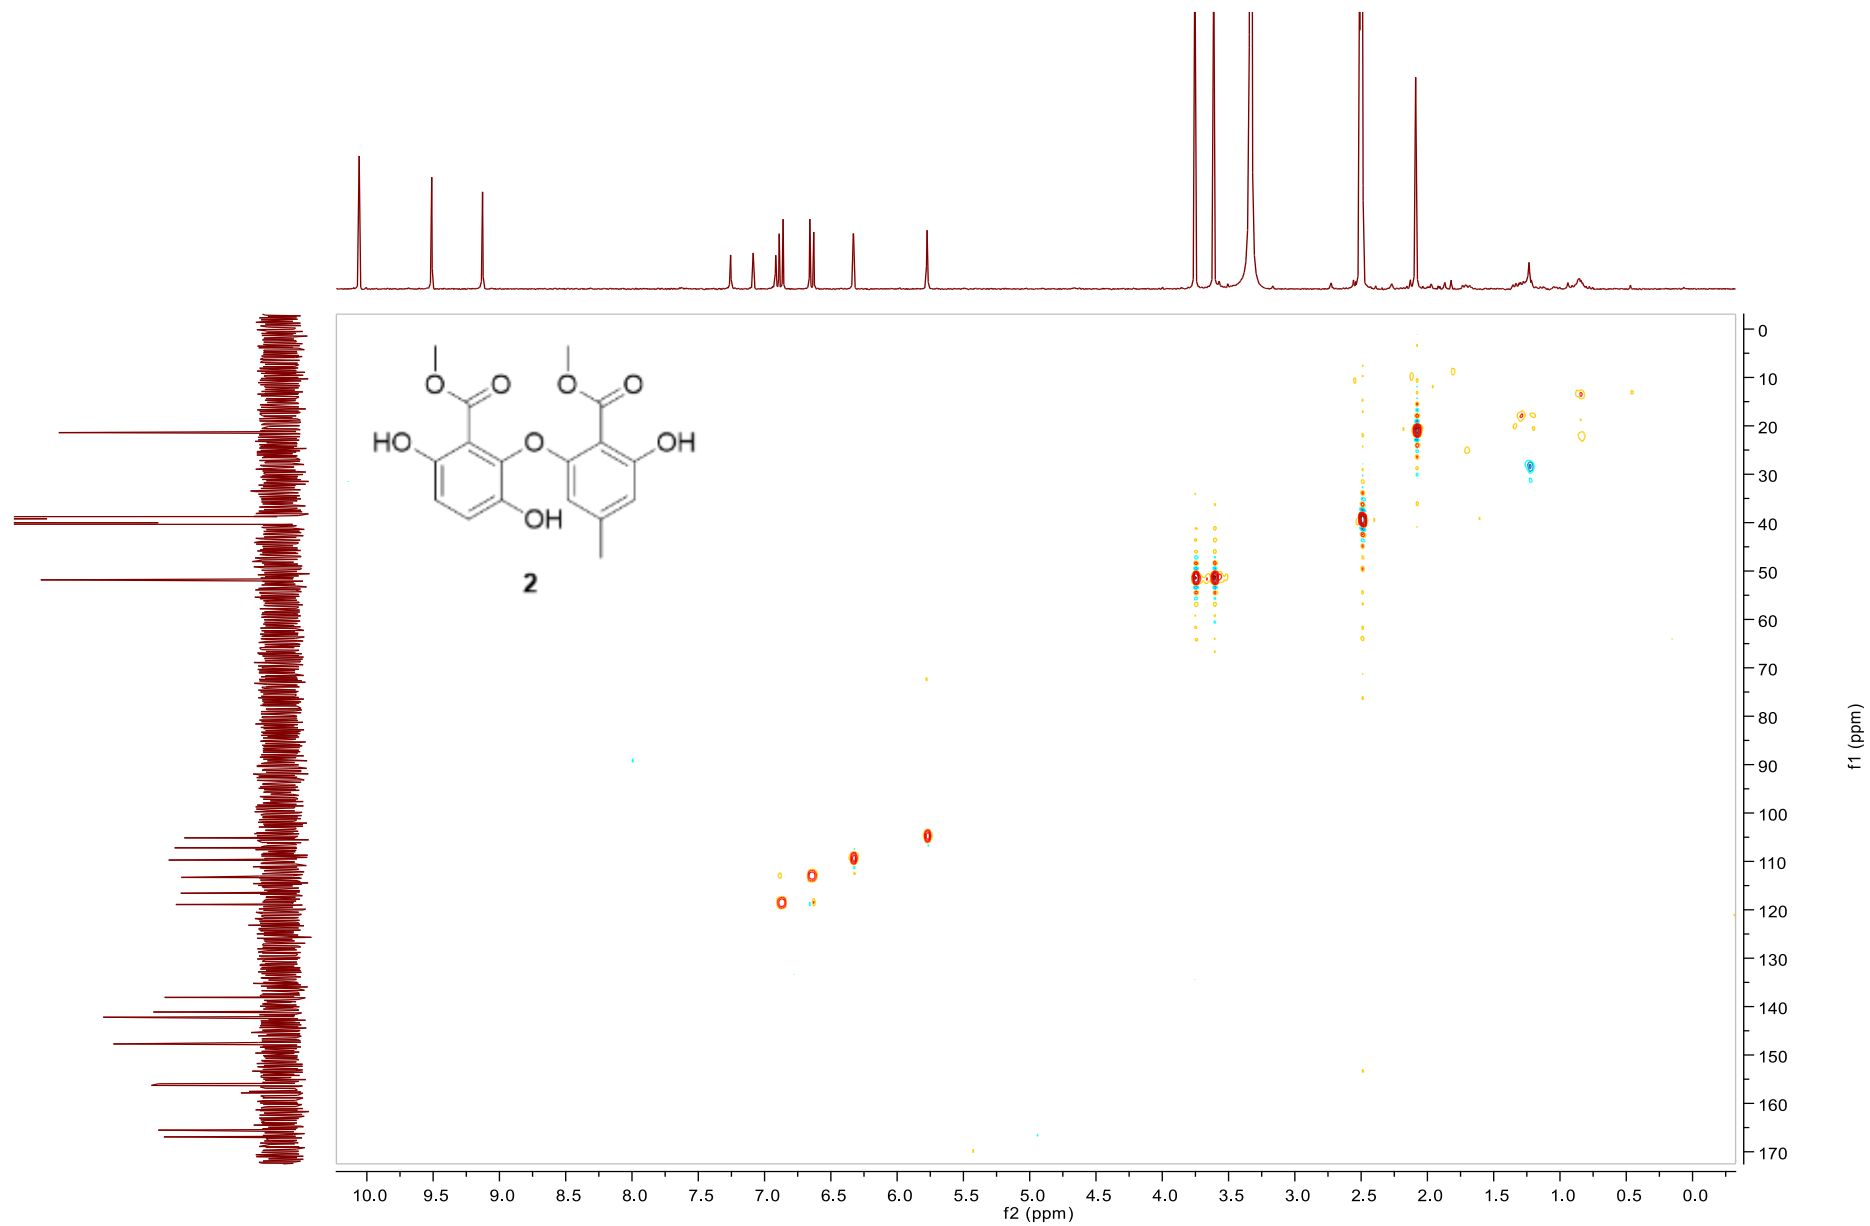

**Figure S13.** HMBC Spectra (400 MHz) of neoasterric methyl ester (**2**) in DMSO- $d_6$

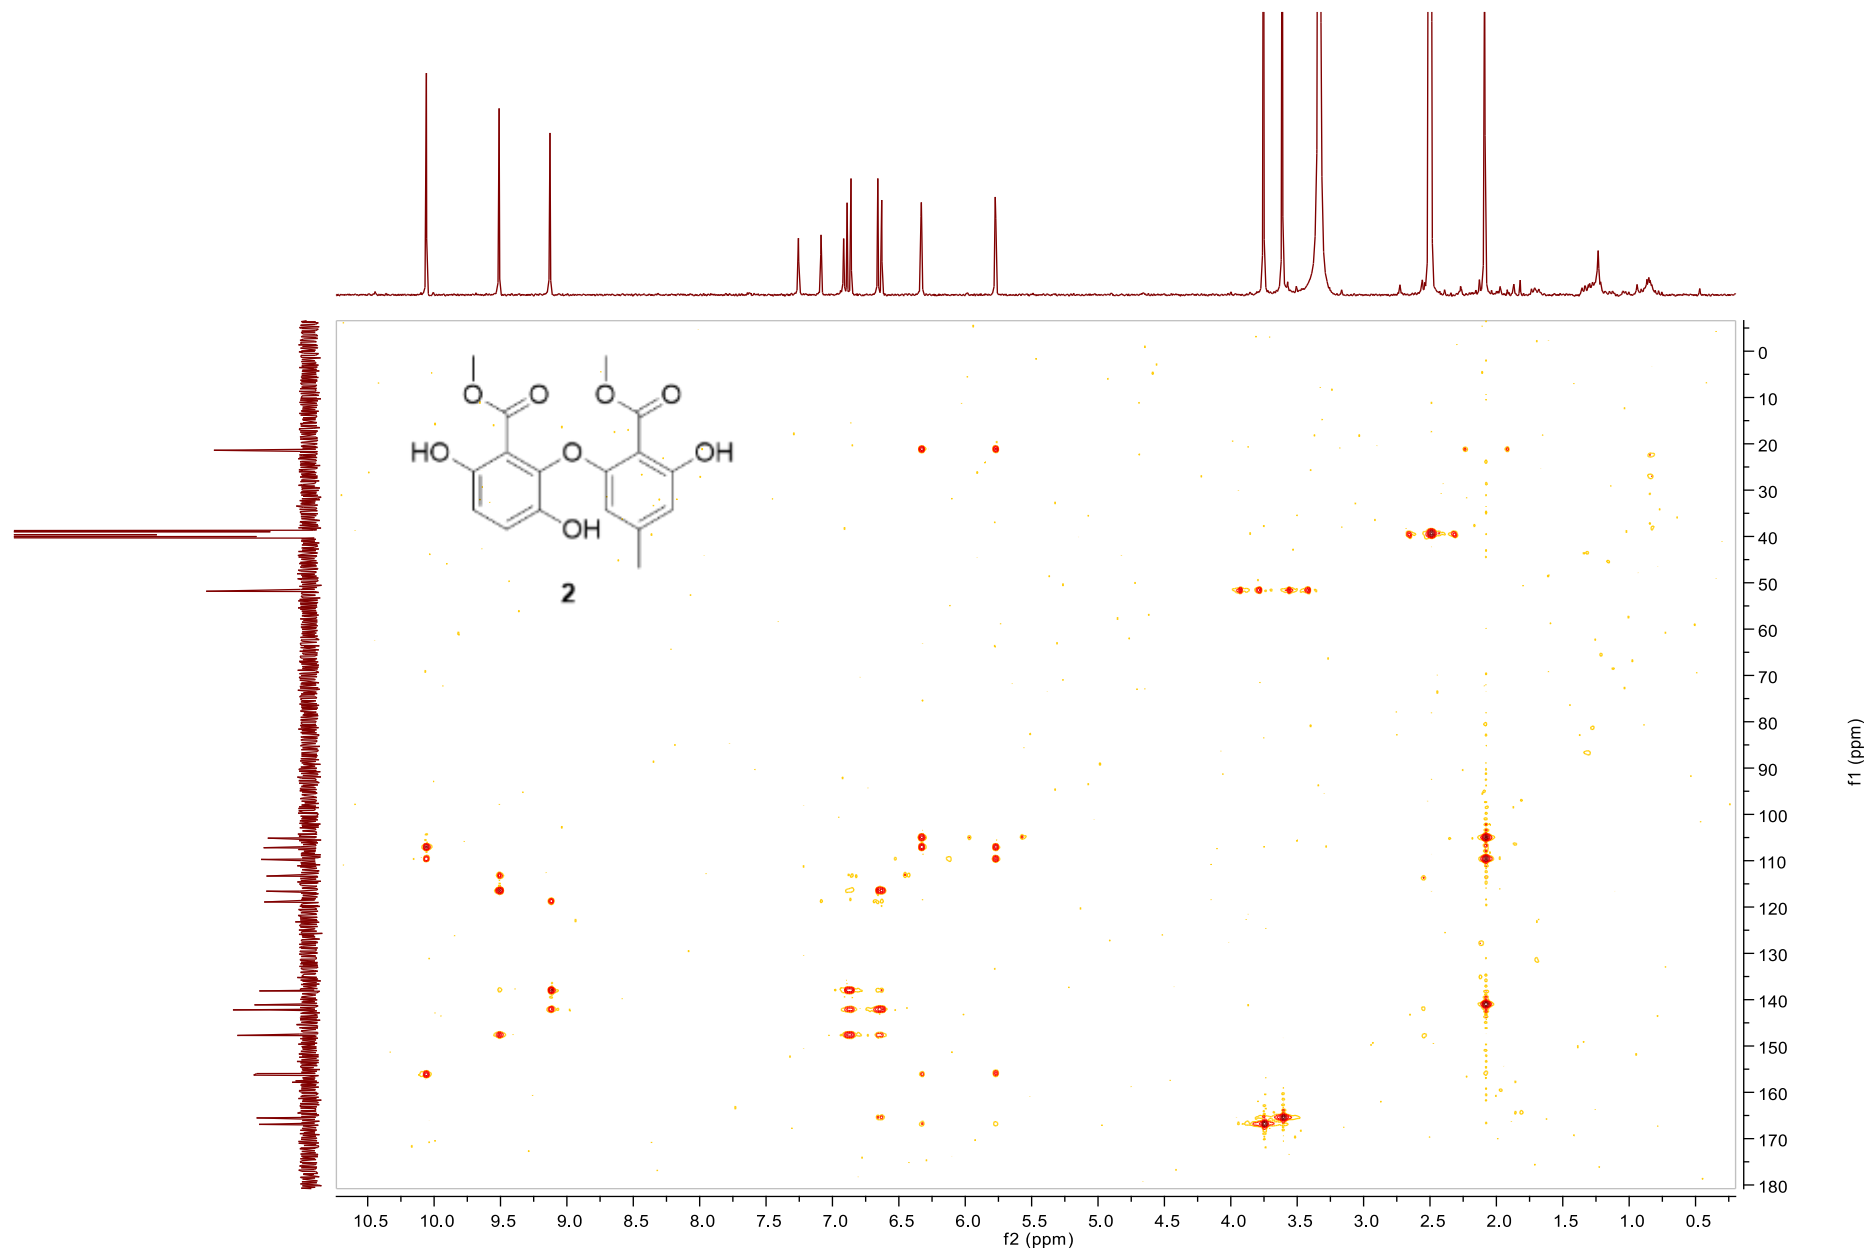



**Figure S14.**  $^1\text{H}$  NMR spectrum (400 MHz) of 7-chloro-4(*1H*)-quinolone (**3**) in  $\text{CD}_3\text{OD}$

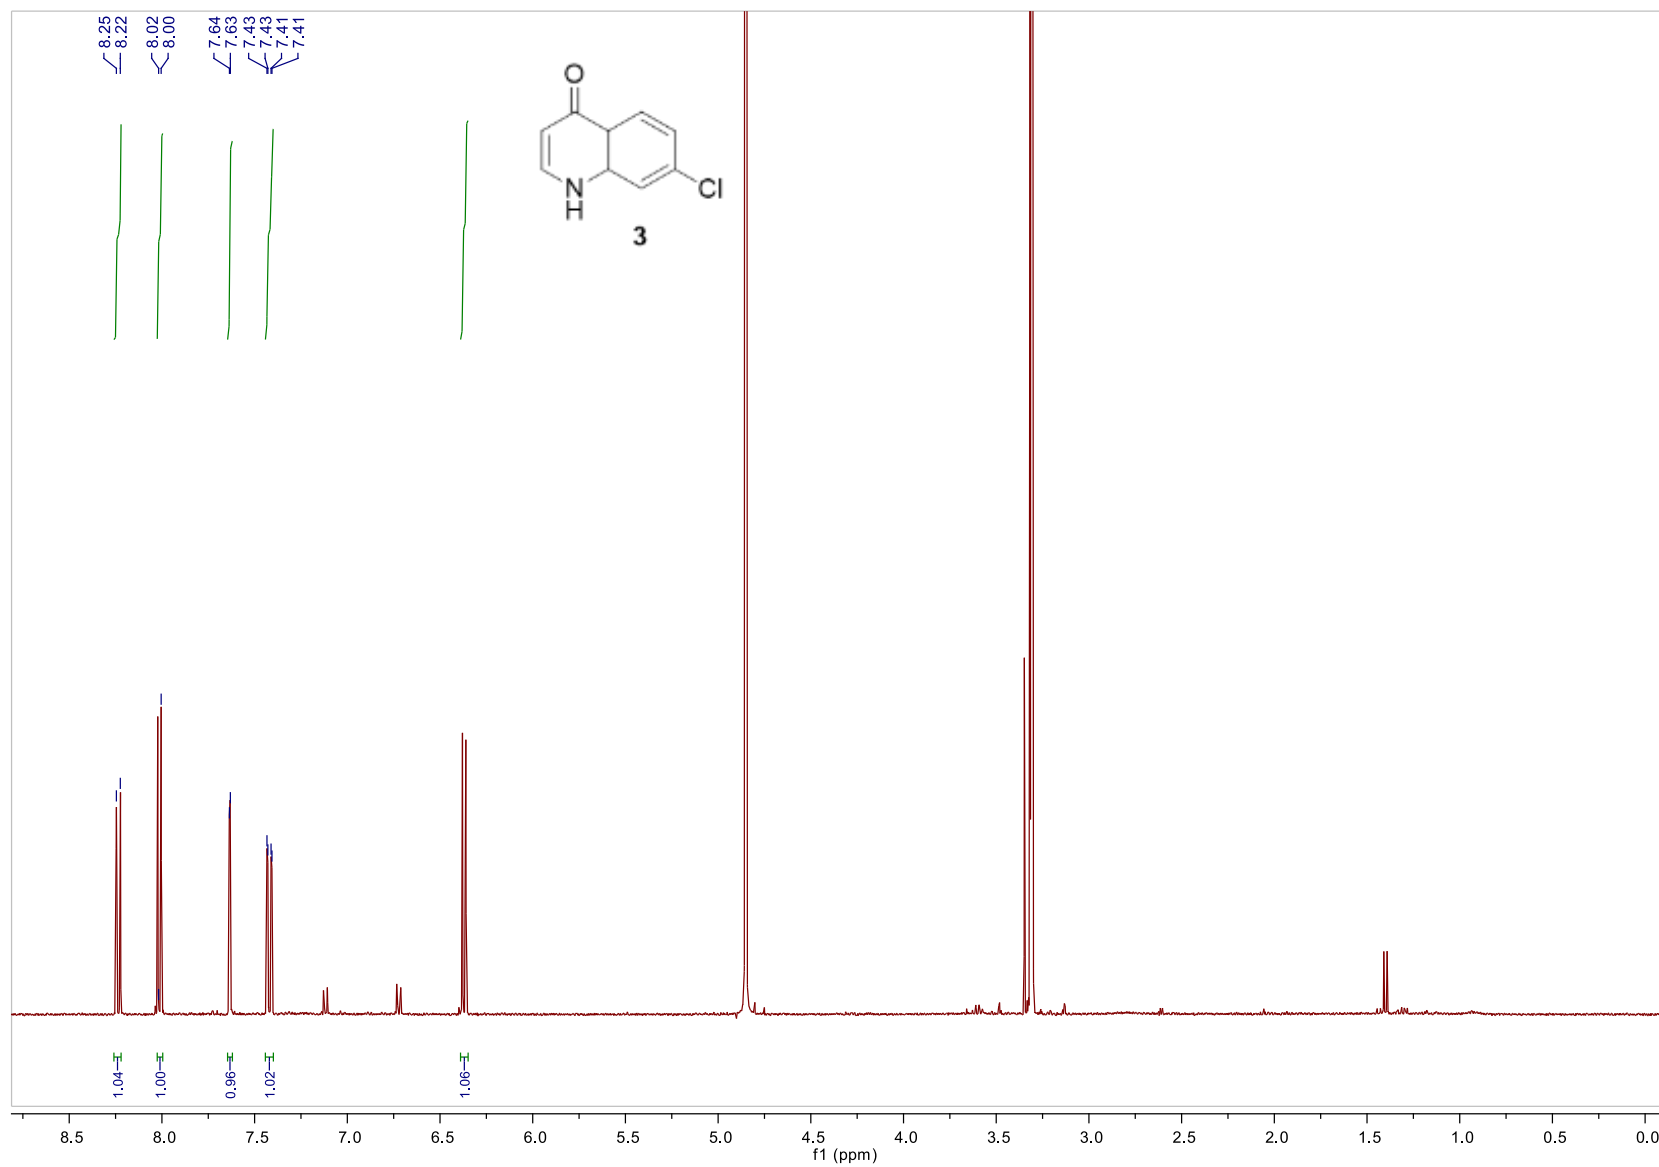

**Figure S15.**  $^{13}\text{C}$  NMR spectrum (100 MHz) of 7-chloro-4(*1H*)-quinolone (**3**) in  $\text{CD}_3\text{OD}$

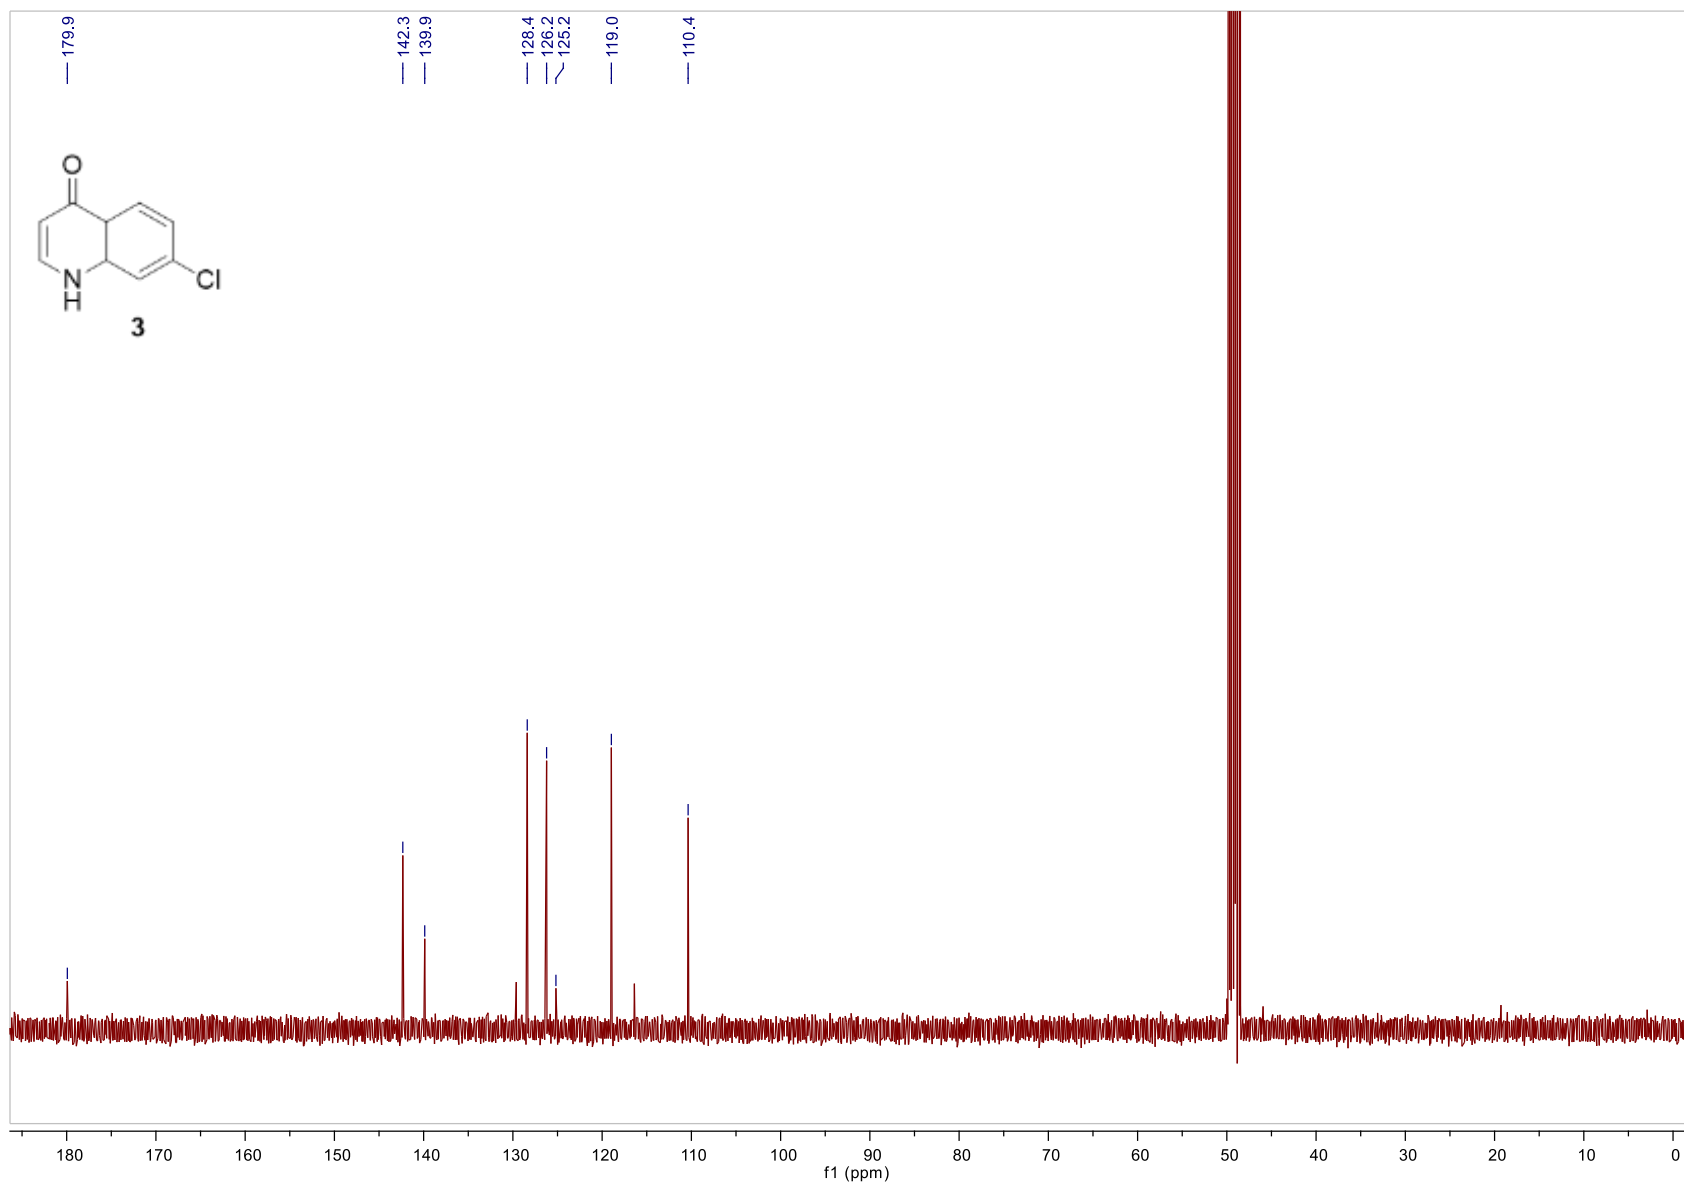

**Figure S16.** COSY spectrum (400 MHz) of 7-chloro-4(1*H*)-quinolone (**3**) in CD<sub>3</sub>OD

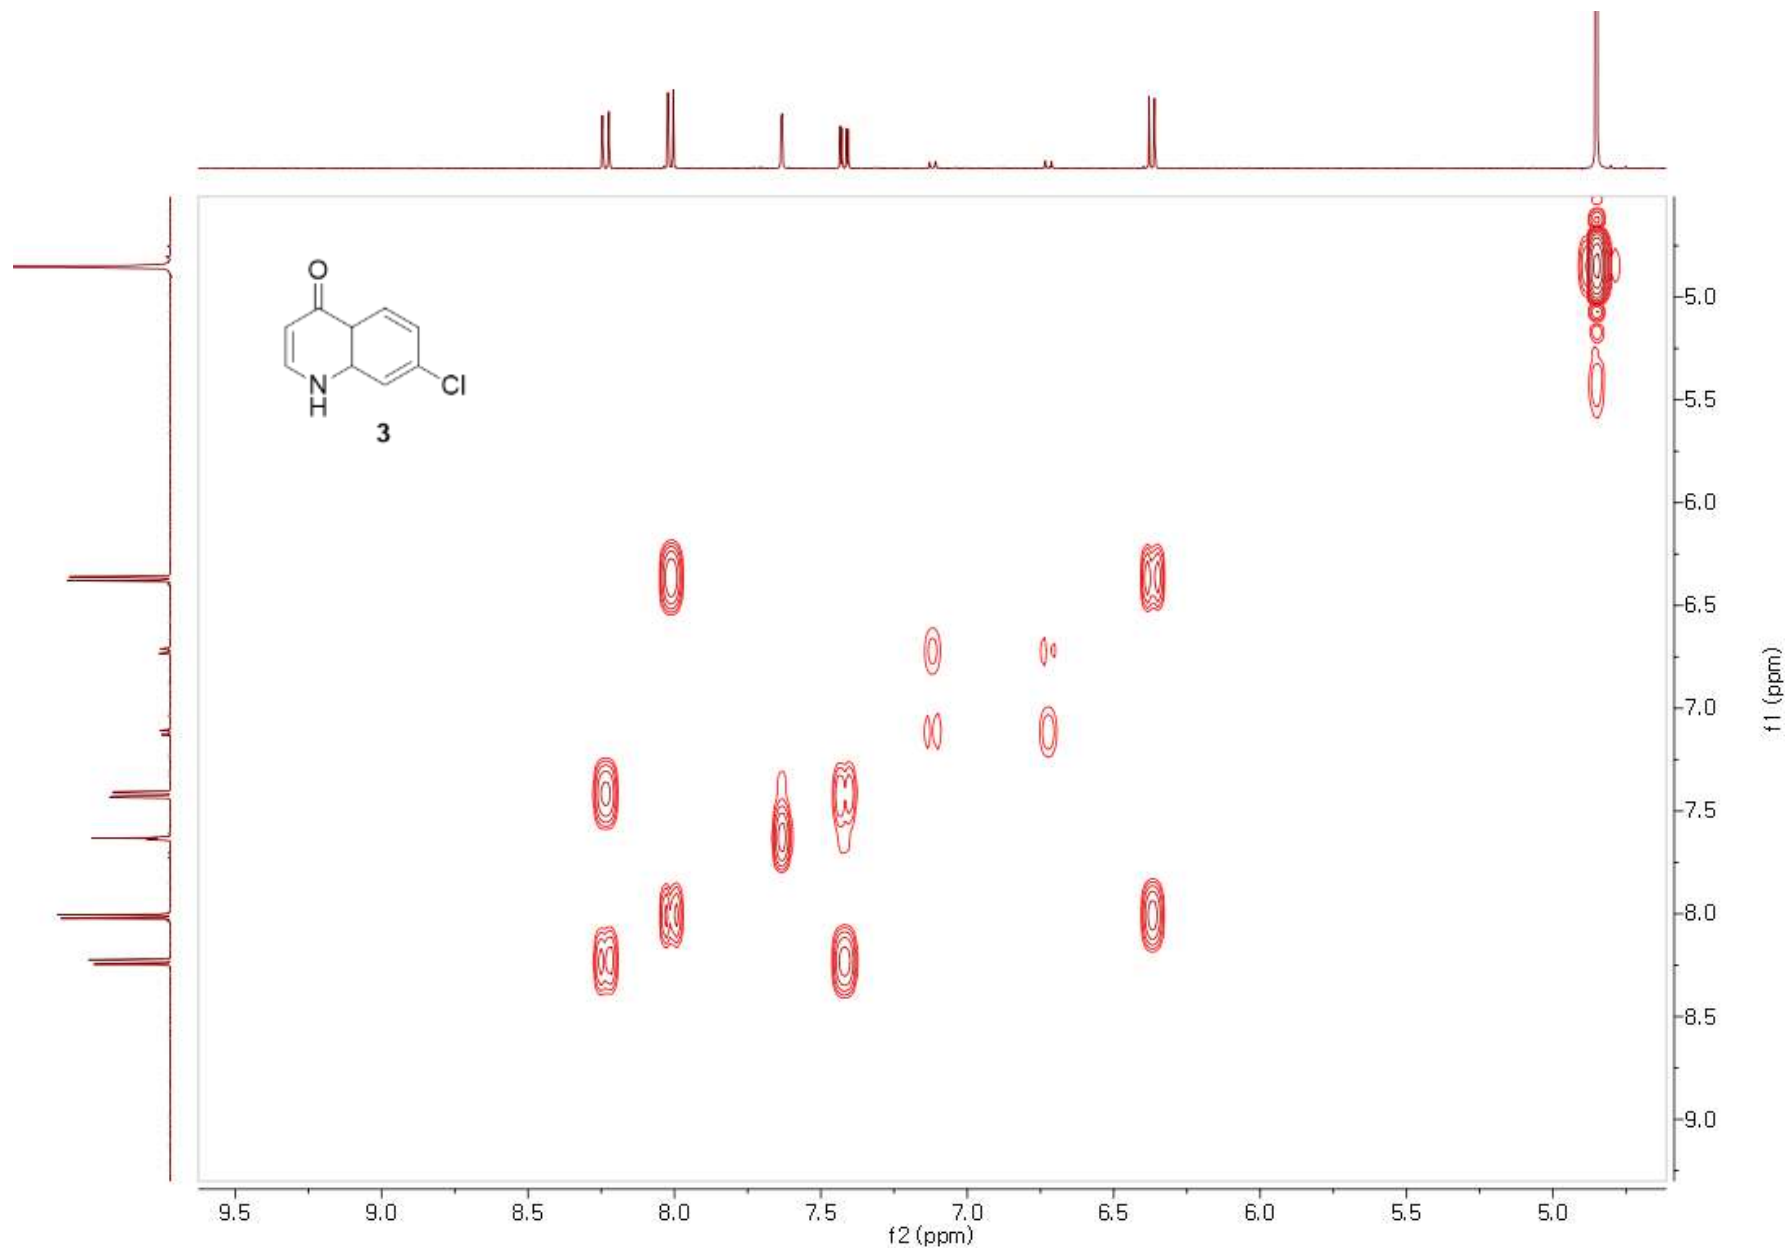

**Figure S17.** HSQC spectrum (400 MHz) of 7-chloro-4(*1H*)-quinolone (**3**) in CD<sub>3</sub>OD

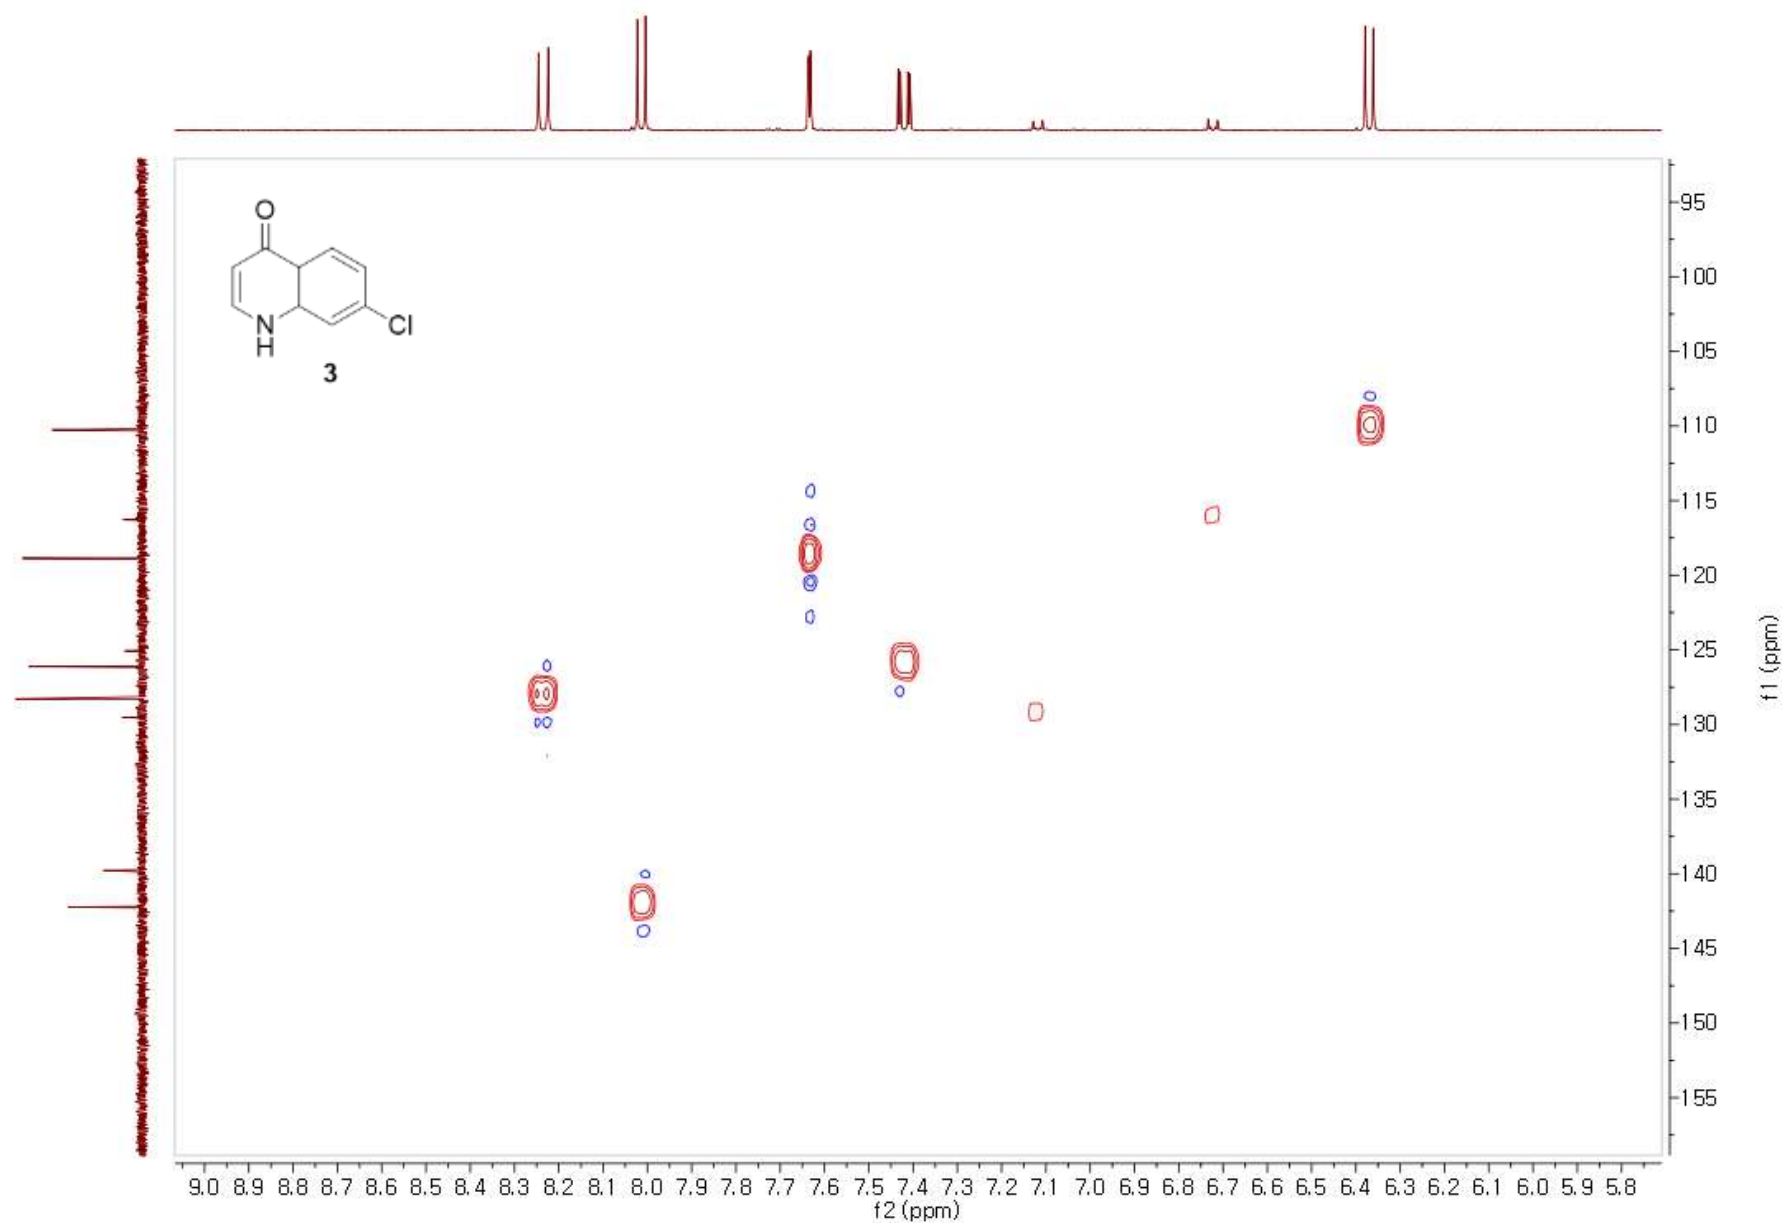

**Figure S18.** HMBC spectrum (400 MHz) of 7-chloro-4(1*H*)-quinolone (**3**) in CD<sub>3</sub>OD

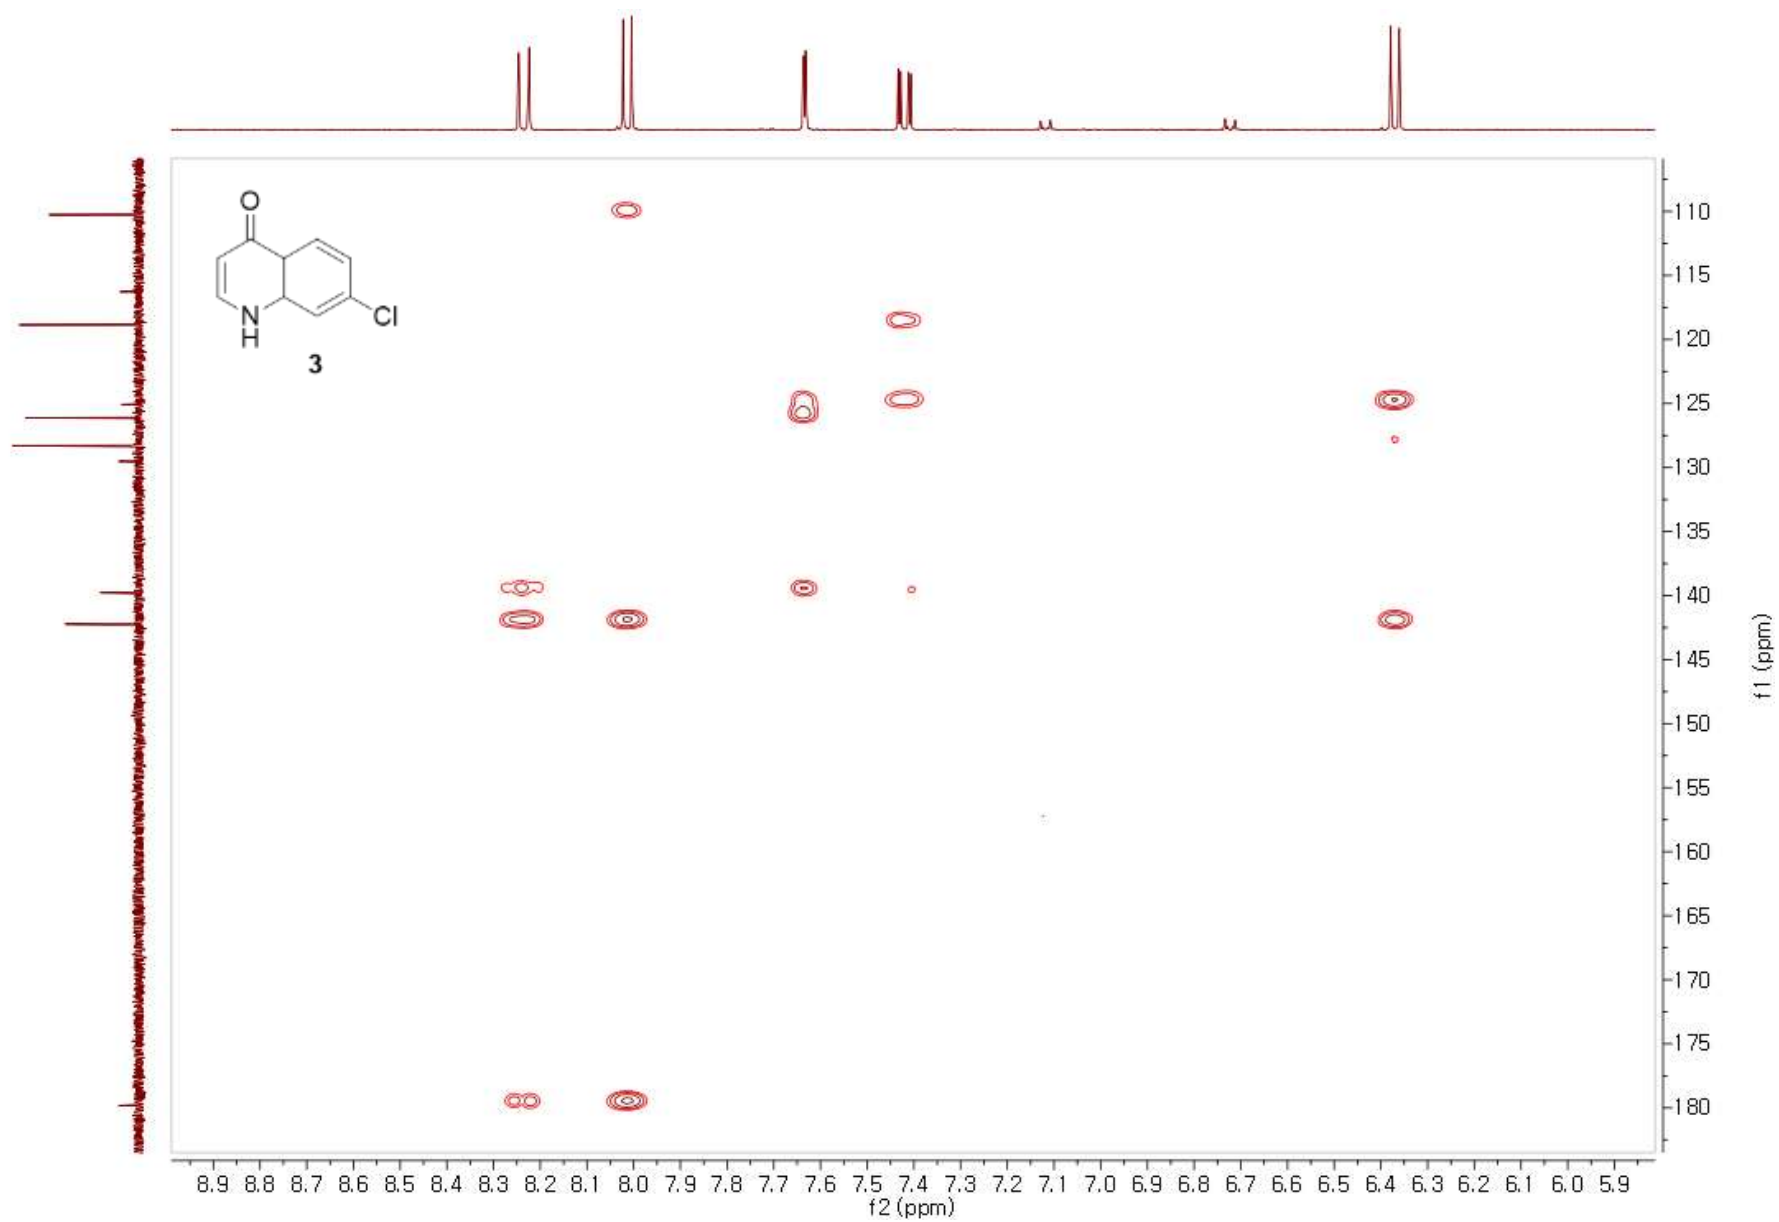

**Figure S19.** LR-ESI-MS spectroscopic data of 7-chloro-4(*1H*)-quinolone (**3**)

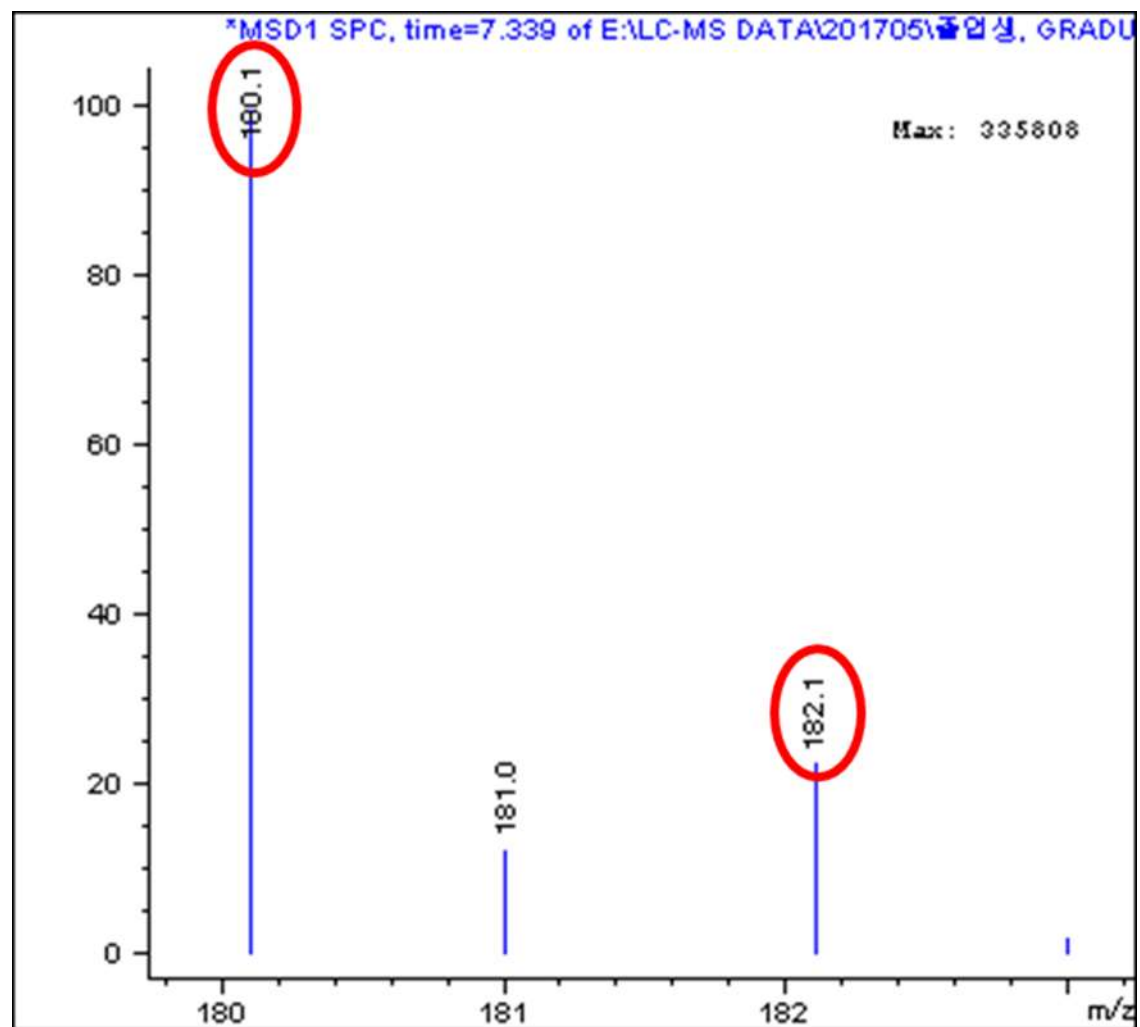

**Figure S20.**  $^1\text{H}$  NMR Spectrum (400 MHz) of acremonidine E (**4**) in  $\text{DMSO}-d_6$

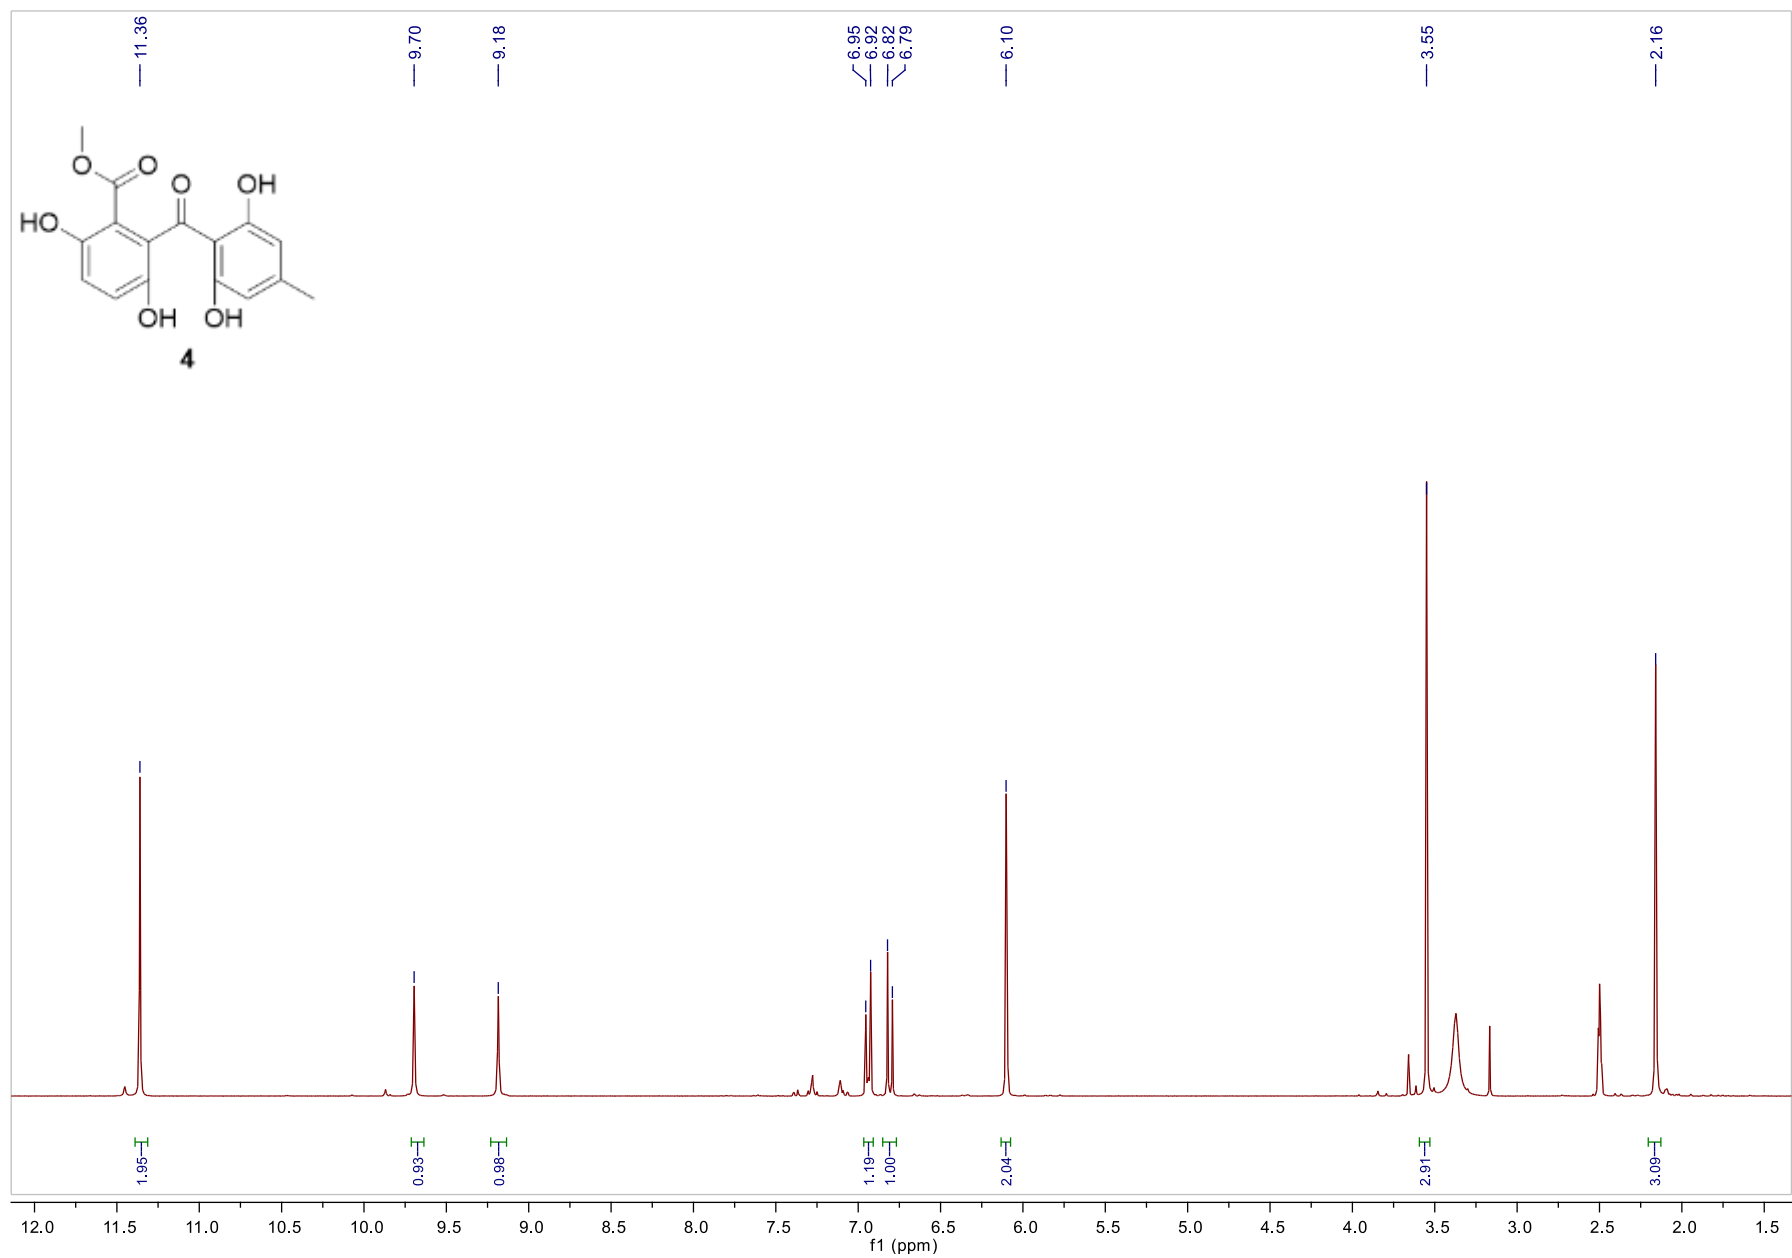

**Figure S21.**  $^{13}\text{C}$  NMR Spectrum (100 MHz) of acremonidine E (**4**) in  $\text{DMSO}-d_6$

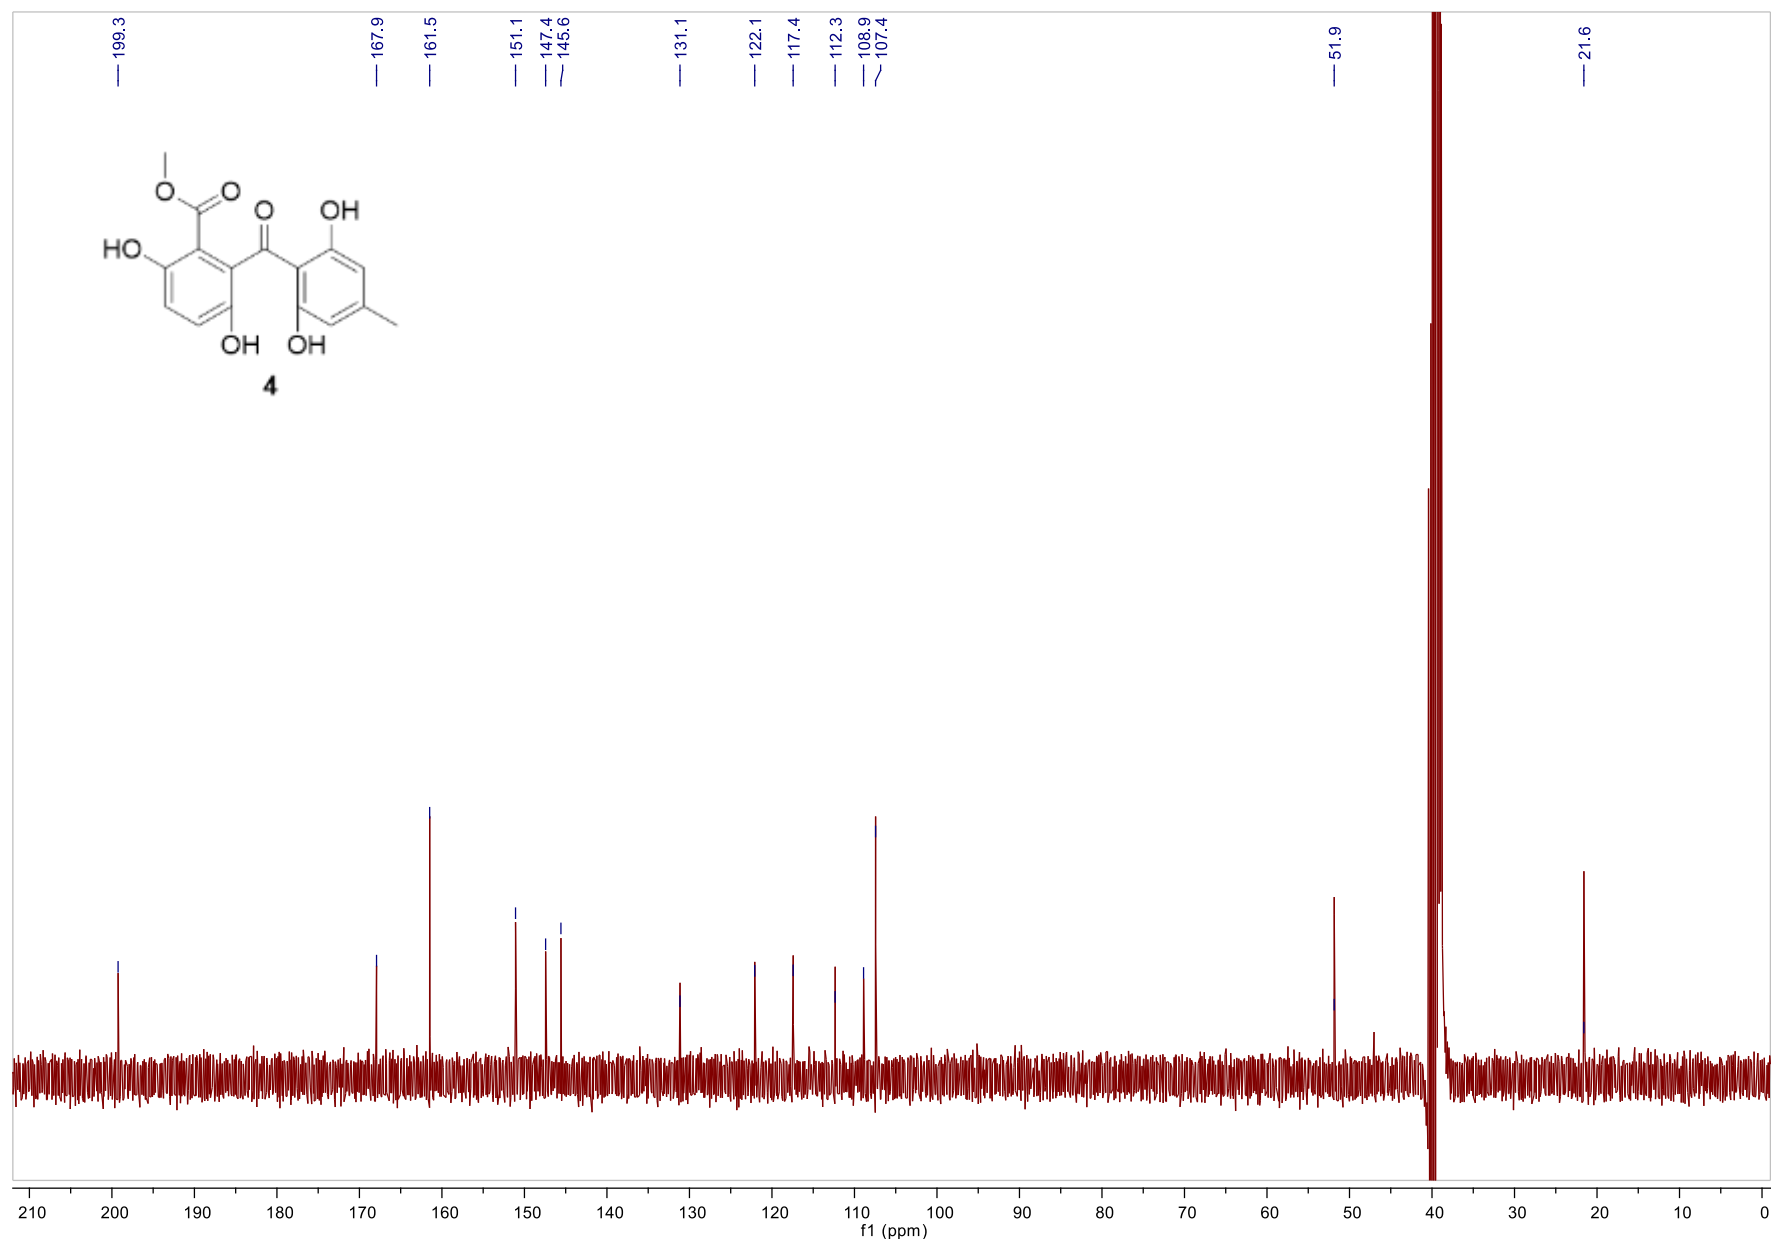



**Figure S22.**  $^1\text{H}$  NMR Spectrum (400 MHz) of pinselin (**5**) in  $\text{DMSO}-d_6$ .

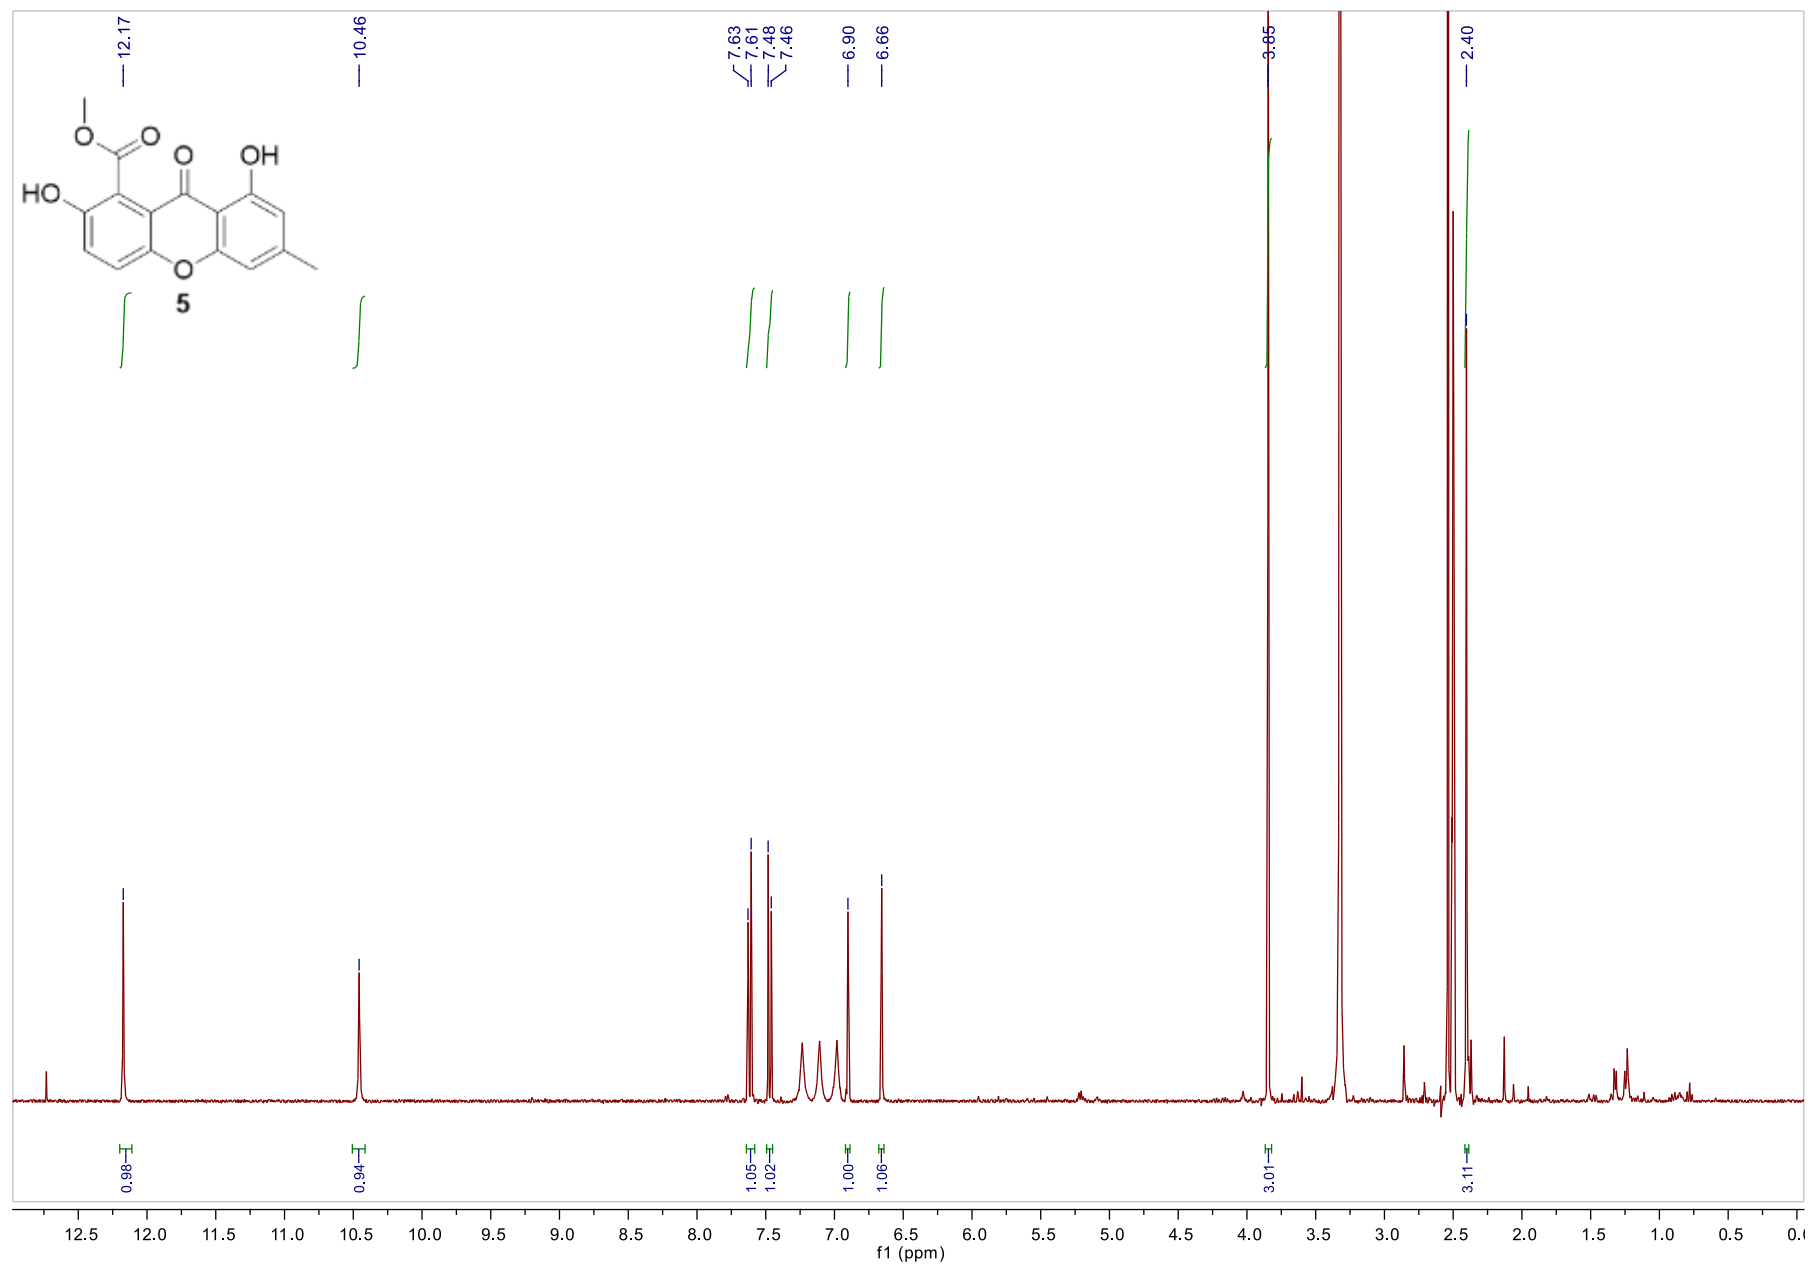

**Figure S23.**  $^{13}\text{C}$  NMR Spectrum (100 MHz) of pinselin (**5**) in  $\text{DMSO}-d_6$ .

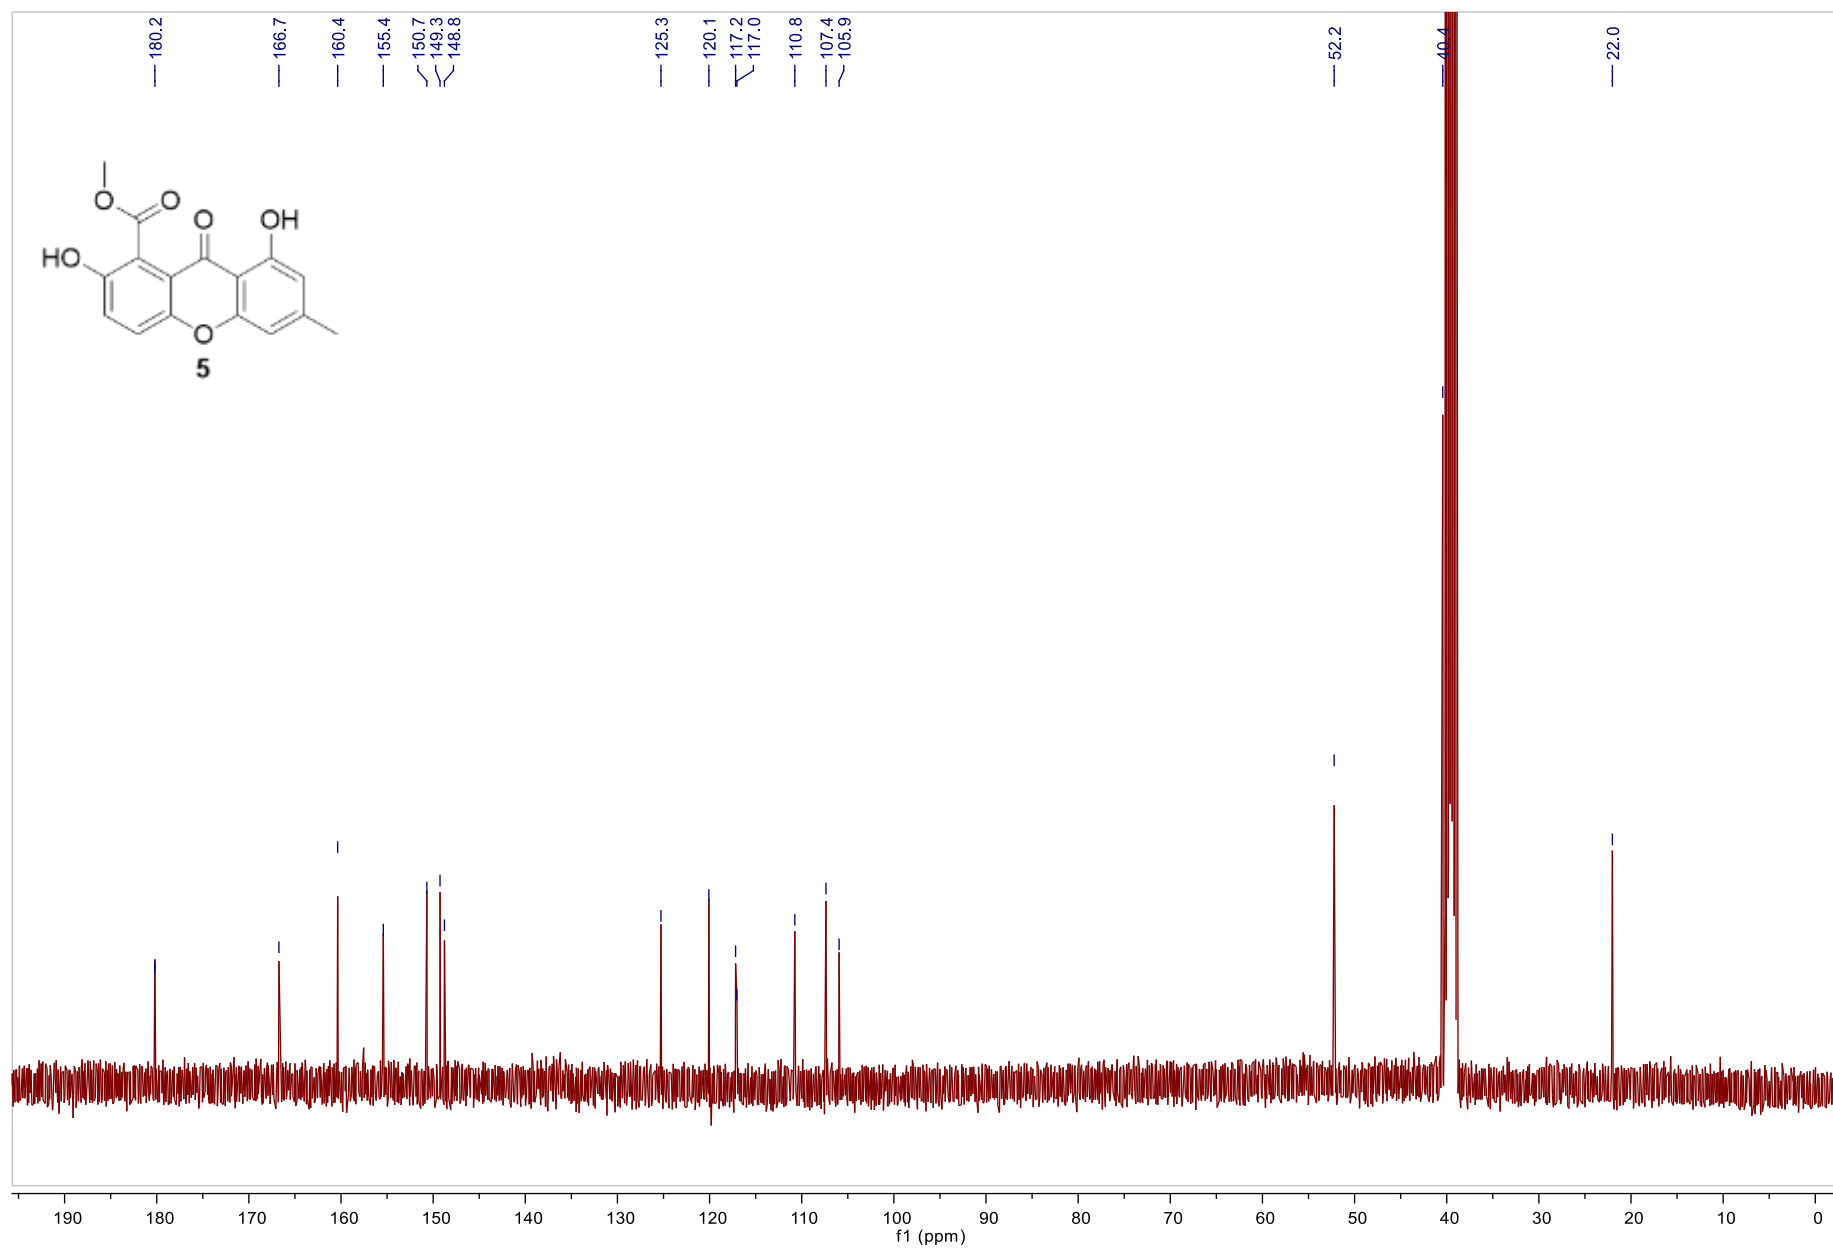

**Figure S24.**  $^1\text{H}$  NMR Spectrum (400 MHz) of penicitirinoini A (**6**) in  $\text{CD}_3\text{OD}$

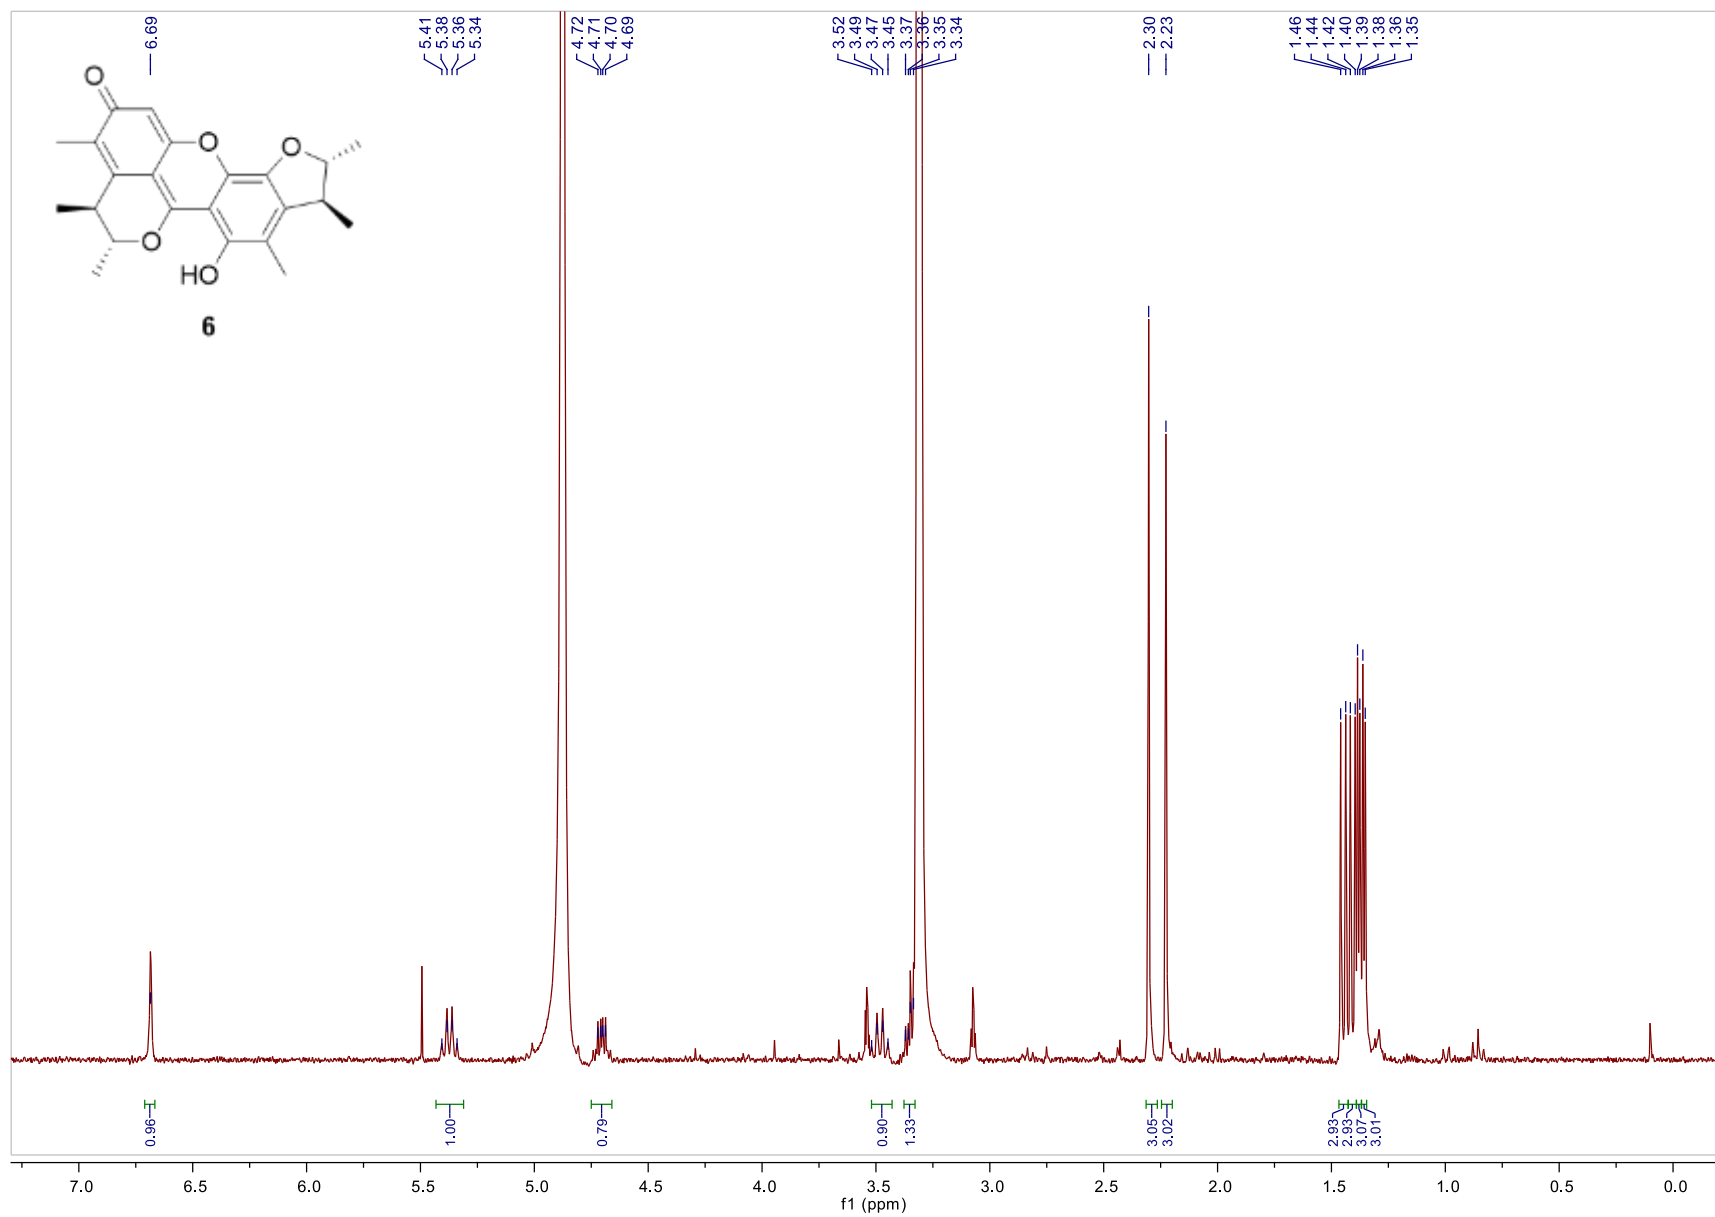

**Figure S25.**  $^{13}\text{C}$  NMR Spectrum (100 MHz) of penicitirinoi A (**6**) in  $\text{CD}_3\text{OD}$

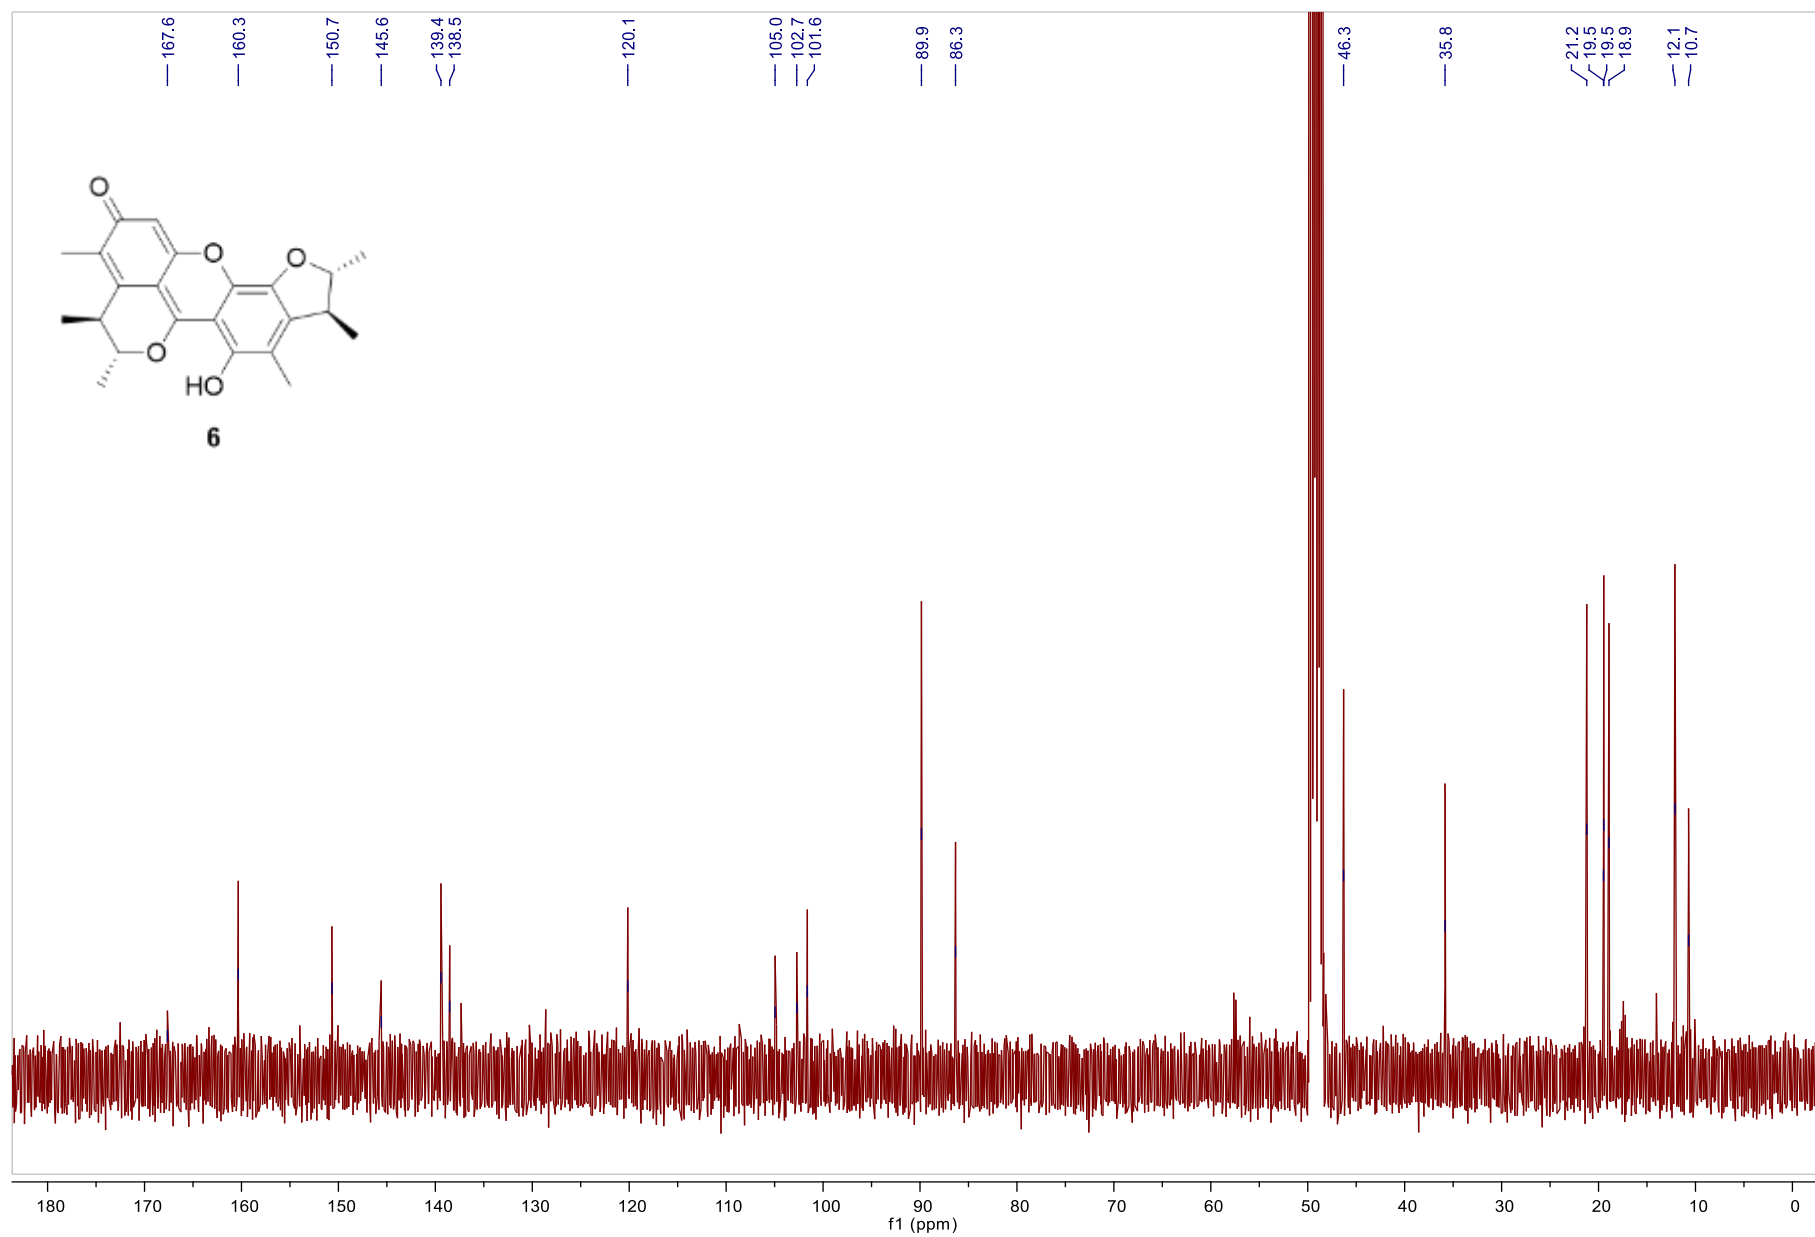

**Figure S26.**  $^1\text{H}$  NMR Spectrum (400 MHz) of penicitirinoini E (**7**) in  $\text{CD}_3\text{OD}$

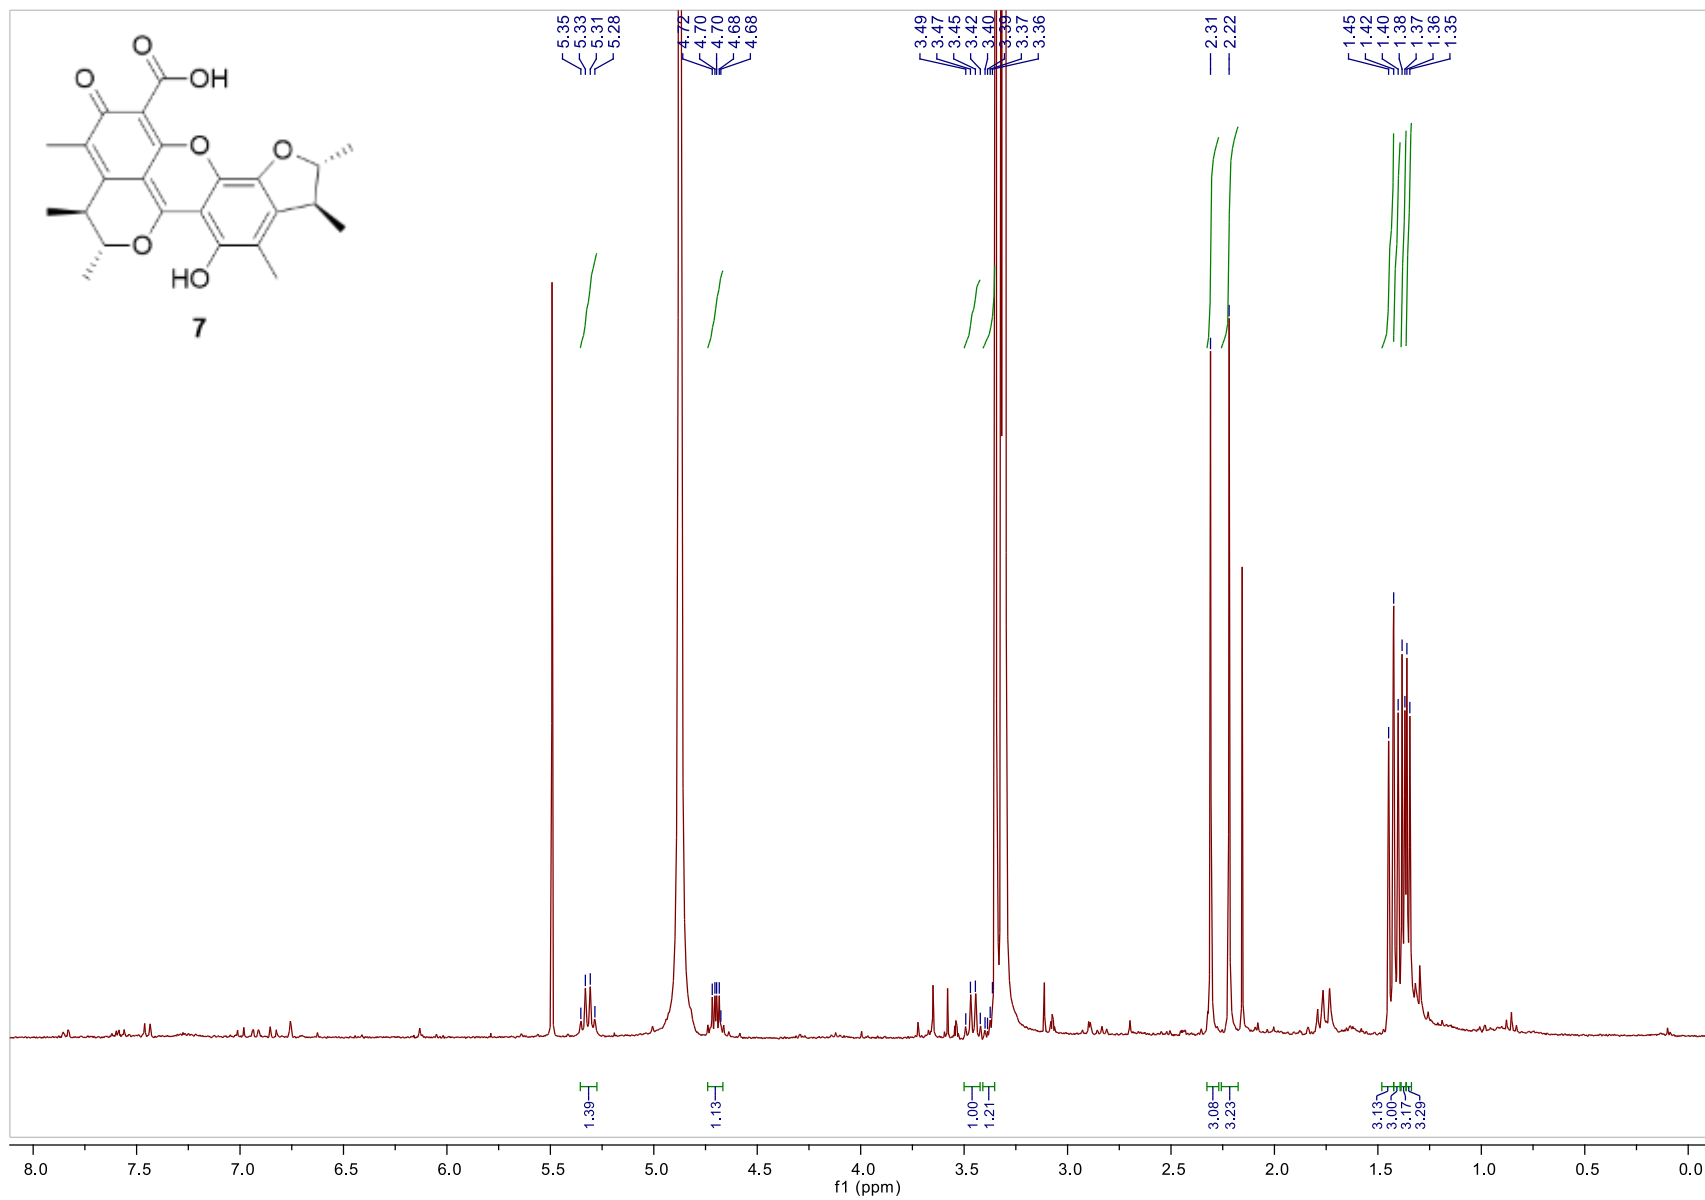

Supplement: s1 [file s1]
